# Supplementary material for: A modular toolbox to generate complex polymeric ubiquitin architectures using orthogonal sortase enzymes
Source: PubMed Central journal article supplement (PMC8585875; doi:10.1038/s41467-021-26812-9), 2021-11-11
Supplement: 41467_2021_26812_MOESM1_ESM.pdf [file 41467_2021_26812_MOESM1_ESM.pdf]

## Supplementary Information

### **A modular toolbox to generate complex polymeric ubiquitin architectures using orthogonal sortase enzymes**

Maximilian Fottner<sup>1,2</sup>, Maria Weyh<sup>1</sup>, Stefan Gaussmann<sup>3,4</sup>, Dominic Schwarz<sup>1</sup>, Michael Sattler<sup>3,4</sup> and Kathrin Lang<sup>1,2\*</sup>

\* to whom correspondence should be addressed: [kathrin.lang@org.chem.ethz.ch](mailto:kathrin.lang@org.chem.ethz.ch)

<sup>1</sup>Department of Chemistry, Lab for Synthetic Biochemistry, Technical University of Munich, Institute for Advanced Study, TUM-IAS, Lichtenberg Str. 4, 85748 Garching, Germany

<sup>2</sup>Laboratory of Organic Chemistry, Department of Chemistry and Applied Biosciences, ETH Zürich, Vladimir-Prelog-Weg 3, 8093 Zurich, Switzerland

<sup>3</sup>Bavarian NMR Center, Department of Chemistry, Technical University of Munich, Ernst-Otto-Fischer-Str. 2, 85748 Garching, Germany

<sup>4</sup>Institute of Structural Biology, Helmholtz Zentrum München, Ingolstädter Landstrasse 1, 85764 Neuherberg, Germany

## Supplementary Figures

### Supplementary Figure 1

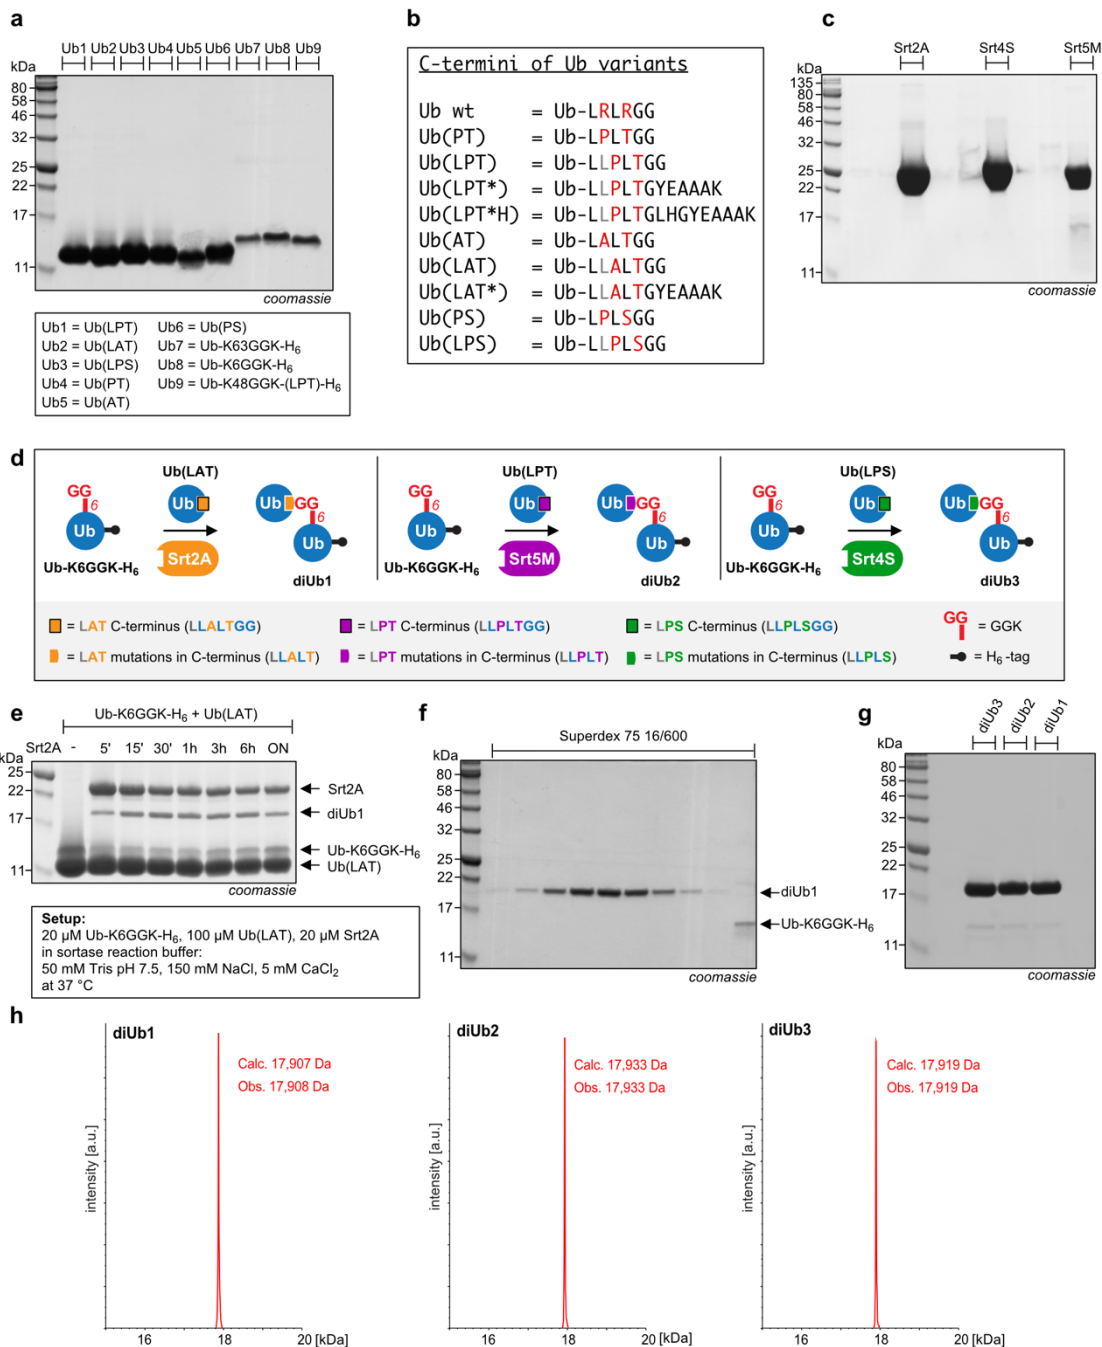

**Supplementary Figure 1. Sortase-mediated generation of K6-linked diUbs.** **a)** Overview of purified Ub-variants. **b)** Table displaying different Ub variants used in this study and their respective C-termini. **c)** Overview of purified sortase variants. **d)** Schematic representation for accessing differently linked diUbs, as needed in the diUb hydrolysis assays for identification of orthogonal sortases. **e)** Generation of a K6-linked diUb using Srt2A. Incubation of Ub-K6GGK-H<sub>6</sub> with Ub(LAT) in the presence of Srt2A leads to specific formation of K6-linked diUb (Ub(LAT)-K6-Ub-H<sub>6</sub>, diUb1). **f)** Purification of diUbs is carried out by affinity purification (Ni-NTA) and size exclusion chromatography (SEC). Exemplary purification of diUb1 *via* SEC. **g)** Overview of purified K6-linked diUbs with different sortase motifs at the linkage site. **h)** LC-MS characterization of the different K6-linked diUbs.

Yields of sortylation were determined densitometrically using ImageJ from Supplementary Figure 1e: diUb1, 1 h, 61%. Consistent results were obtained over at least three replicate experiments. Source data are provided as a Source Data file.

## Supplementary Figure 2

a

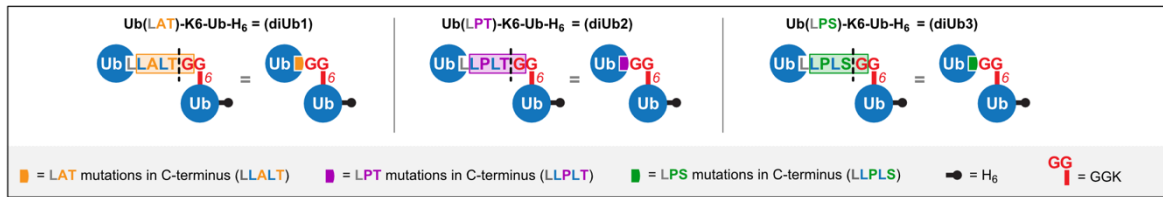

b

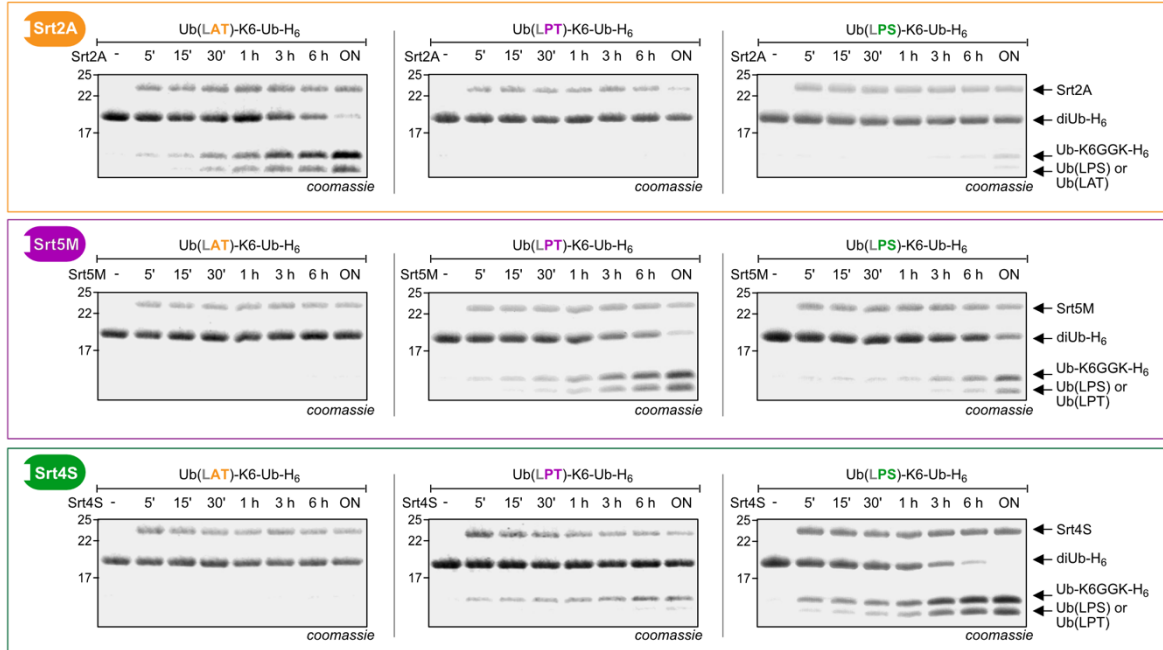

c

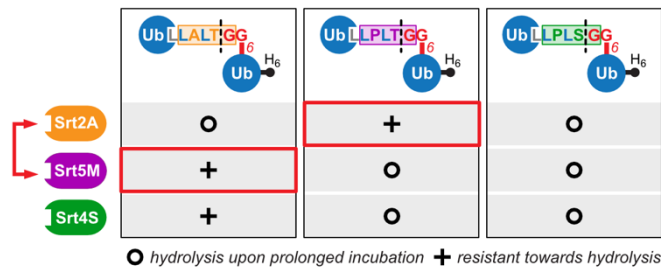

**Supplementary Figure 2. Identification of orthogonal sortases *via* hydrolysis of sortase-generated diUbs.** **a)** Overview of sortase-generated diUbs. **b)** Each sortase-generated diUb (diUb1, diUb2 and diUb3) is incubated individually with all three different sortase enzymes. Samples taken at the denoted time points are analysed by SDS-PAGE. All sortase variants exhibit on-target hydrolysis activity on a K6-linked diUb displaying their own recognition motif at the linkage site. Srt4S shows off-target reactivity towards the Srt5M-LPLTG motif, but does not hydrolyse the Srt2A-LALTG linked K6-diUb. Srt5M shows off-target reactivity towards the Srt4S-LPLSG motif, but does not hydrolyse the Srt2A-LALTG motif. Srt2A shows weak off-target reactivity for the Srt4S-LPLSG motif and is not able to hydrolyse the Srt5M-LPLTG motif. As Srt2A and Srt5M do not hydrolyse/recognize their respective recognition motifs, Srt2A/Srt5M represent a pair of bidirectional orthogonal sortases. **c)** Schematic representation of hydrolysis assay. Consistent results were obtained over at least three replicate experiments. Source data are provided as a Source Data file.

### Supplementary Figure 3

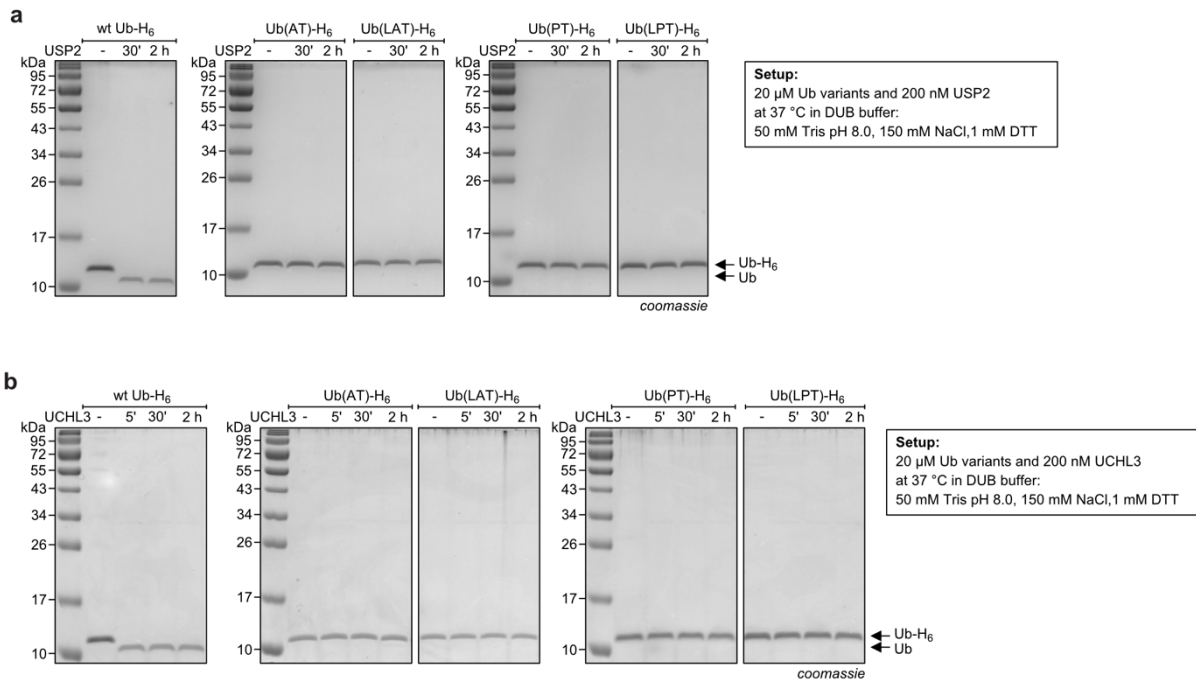

**Supplementary Figure 3. DUB assays with Ub variants bearing different C-terminal mutations. a)** SDS-PAGE analysis of DUB hydrolysis assays with the catalytic domain of USP2. In presence of USP2, wt Ub with a C-terminal H<sub>6</sub>-tag shows quantitative H<sub>6</sub>-tag cleavage within 30 min. With Ub variants bearing the different sortase motifs (AT, LAT, PT, LPT) at their C-termini, H<sub>6</sub>-tag cleavage was not observed. **b)** SDS-PAGE analysis of DUB assays with UCHL3. In presence of UCHL3, wt Ub with a C-terminal H<sub>6</sub>-tag shows quantitative H<sub>6</sub>-tag cleavage within 5 min. With Ub variants bearing the different sortase motifs (AT, LAT, PT, LPT) at their C-termini, H<sub>6</sub>-tag cleavage was not observed. Consistent results were obtained over at least three replicate experiments. Source data are provided as a Source Data file.

## Supplementary Figure 4

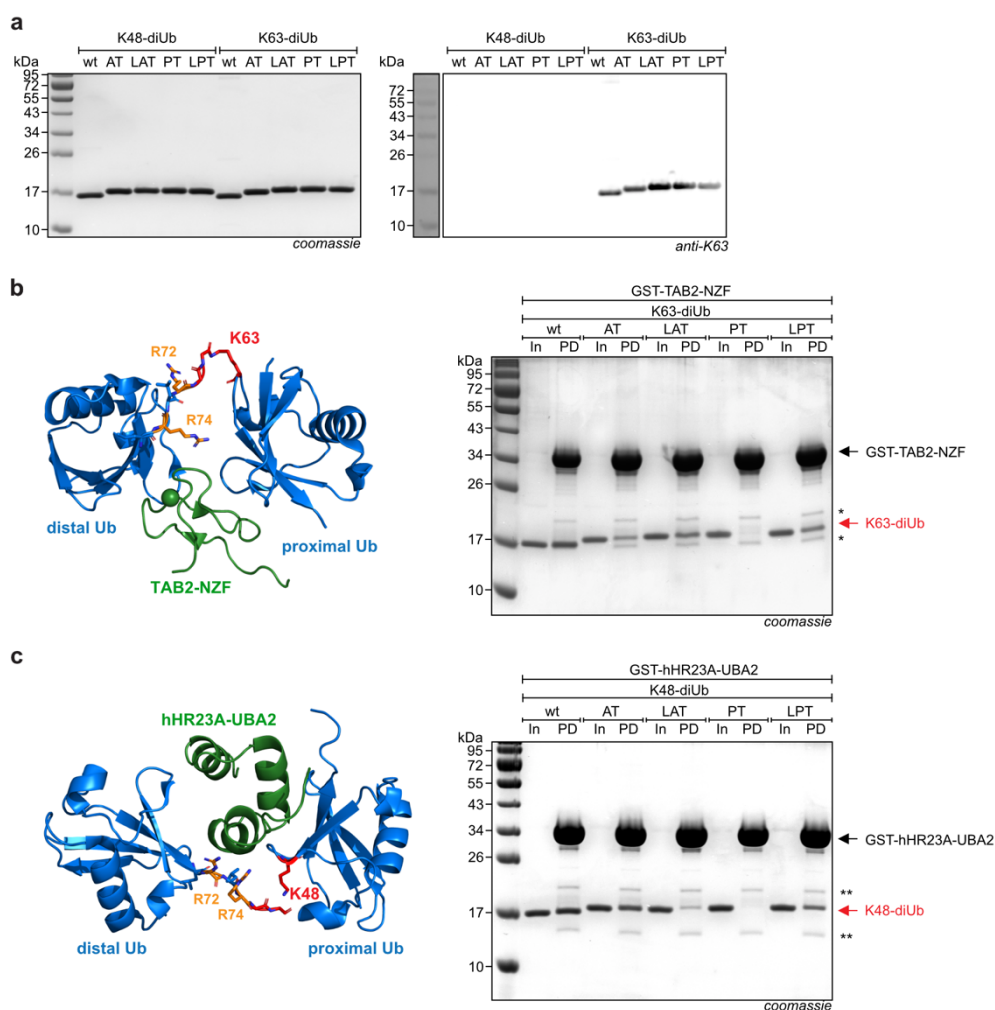

**Supplementary Figure 4. Interaction of sortase-generated diUbs with Ub-binding domains (UBDs)** **a)** Probing different K48- and K63-linked diUbs displaying different sortase motifs with a K63-specific antibody. Left: Coomassie-stained SDS PAGE gel, right: Western blot with an anti-K63-linkage specific antibody. **b)** Interaction of differently linked K63-diUbs with TAB2-NZF. Left: Structure of K63-diUb bound to TAB2-NZF (PDB: 2WWZ<sup>1</sup>). Right: Full SDS-PAGE of pull-down (PD) experiments with differently linked K63-diUbs and GST-fused TAB2-NZF. **c)** Interaction of differently linked K48-diUbs with hHR23A UBA2. Left: NMR structure of the hHR23A UBA2 domain bound to K48-linked diUb (PDB: 1ZO6<sup>2</sup>). Right: Full SDS-PAGE of pull-down experiments with differently linked K48-diUbs and GST-fused hHR23A-UBA2. In: input sample i.e. differently linked K48- or K63-diUbs, PD: pull-down. “\*” marks impurities present in GST-TAB2-NZF. “\*\*” marks impurities present in GST-hHR23A-UBA2. Consistent results were obtained over at least three replicate experiments. Source data are provided as a Source Data file.

## Supplementary Figure 5

### a Assembly of diUb

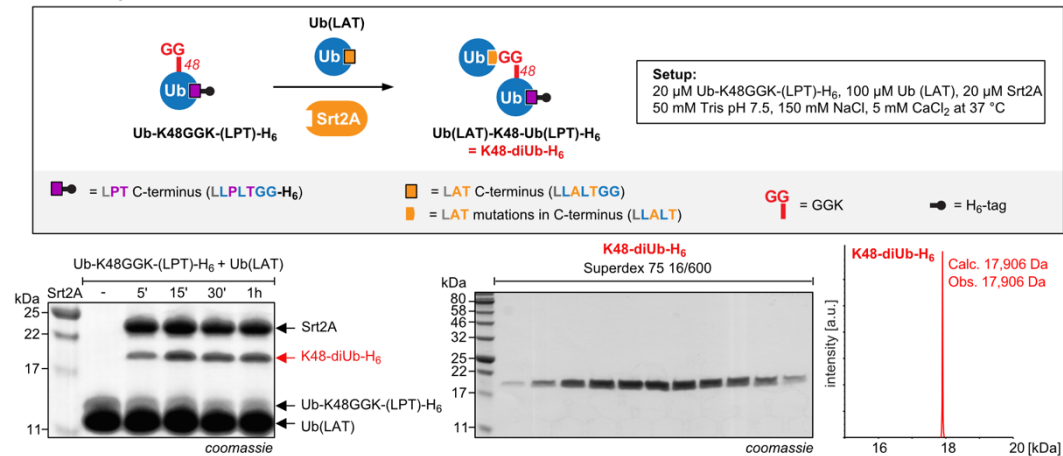

### b Assembly of triUb

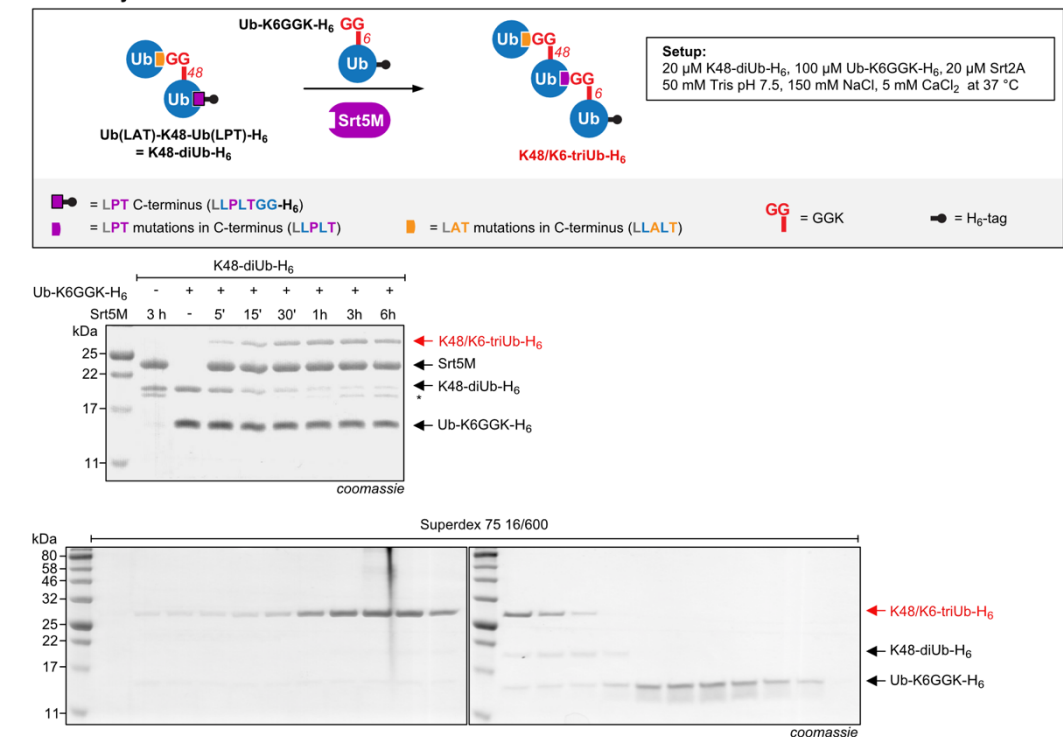

**Supplementary Figure 5. Generation of a heterotypically linked triUb using the orthogonal sortase pair Srt2A/Srt5M.** **a**) Schematic representation of the Srt2A-mediated assembly of K48-diUb as needed for subsequent triUb formation. SDS-PAGE analysis displaying that incubation of Ub-K48GGK-(LPT)-H<sub>6</sub> with Ub(LAT) in the presence of Srt2A leads to formation of Ub(LAT)-K48-Ub-(LPT)-H<sub>6</sub>, denoted as K48-diUb-H<sub>6</sub>. K48-diUb-H<sub>6</sub> was purified *via* Ni-NTA (Ni-Nitrilotriacetic acid) chromatography and SEC (Superdex 75 16/600). LC-MS analysis confirmed the identity of the Srt2A-generated K48-diUb-H<sub>6</sub>. **b**) Schematic representation of the Srt5M-mediated assembly of the heterotypically linked K48/K6 triUb. SDS-PAGE analysis shows Srt5M-catalyzed transpeptidation between the K48-diUb-H<sub>6</sub> and Ub-K6GGK-H<sub>6</sub> resulting in the formation of heterotypically K48/K6 linked triUb (K48/K6-triUb-H<sub>6</sub>). ‘\*’ denotes Srt5M-mediated hydrolysis of the Srt5M recognition motif and thereby cleavage of H<sub>6</sub>-tag from K48-diUb-H<sub>6</sub>. K48/K6-triUb was purified by Ni-NTA chromatography and SEC (Superdex 75 16/600).

Yields of sortylation were determined densitometrically using ImageJ from: Supplementary Figure 5a: K48-diUb(LAT)-H<sub>6</sub>, 30', 63%; Supplementary Figure 5b: K48/K3-triUb-H<sub>6</sub>, 3 h, 78%. Consistent results were obtained over at least three replicate experiments. Source data are provided as a Source Data file.

## Supplementary Figure 6

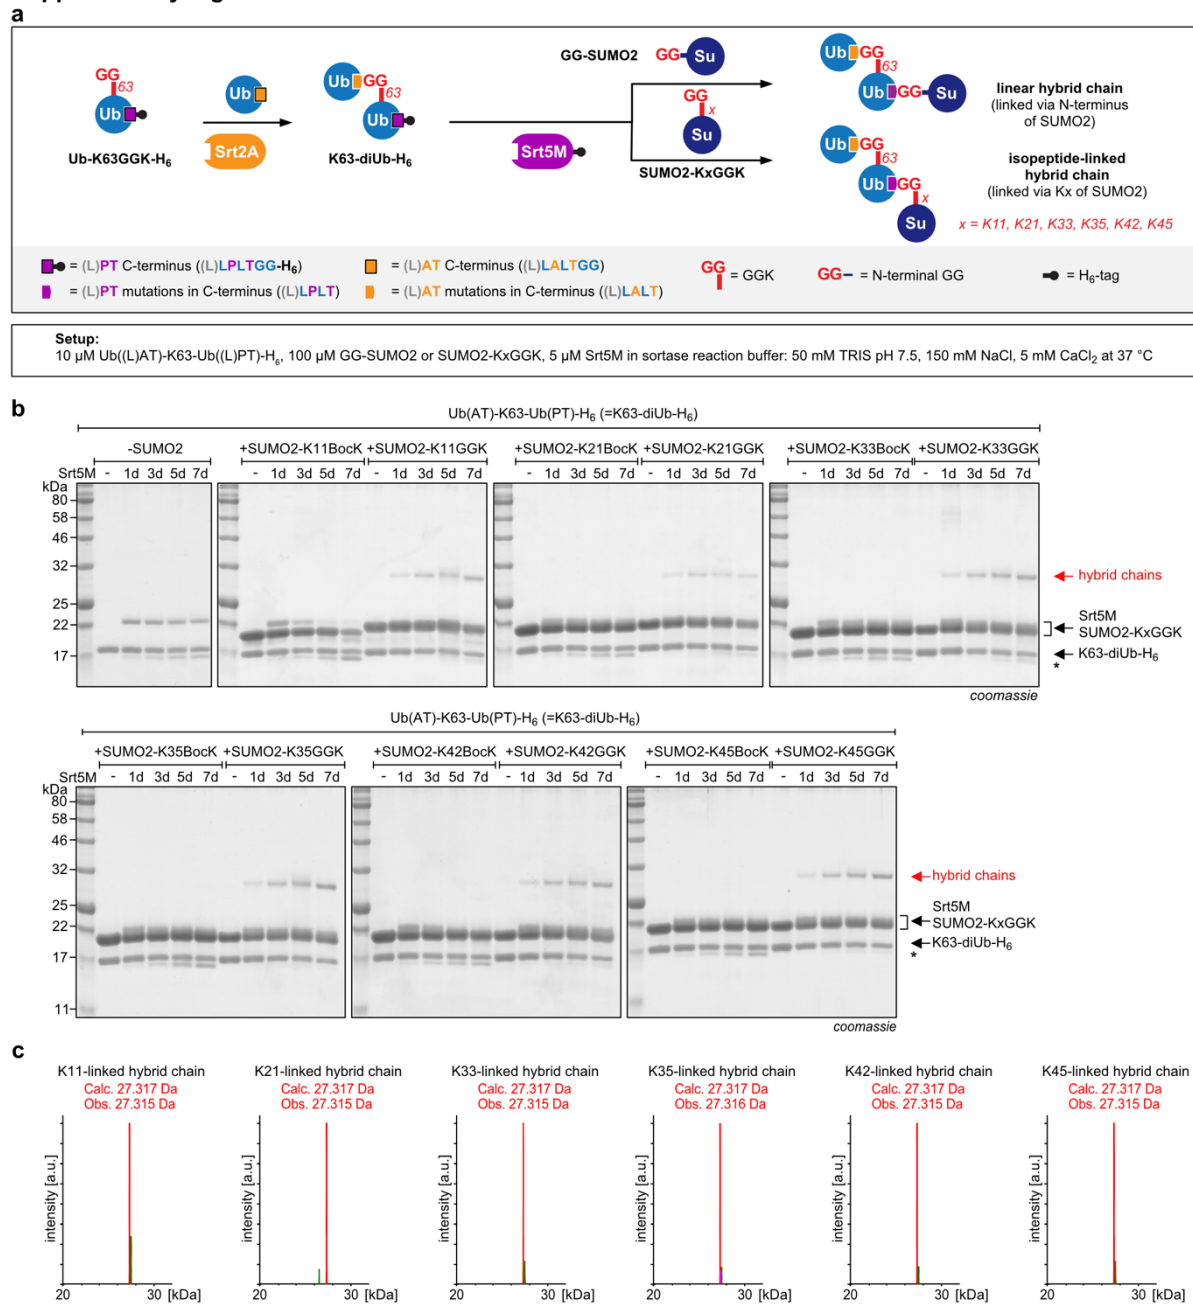

**Supplementary Figure 6. Generation of differently linked K63-diUb-SUMO2 hybrid chains using the orthogonal Srt2A/Srt5M pair.** **a**) Schematic representation of the two-step assembly of differently linked K63-diUb-SUMO2 hybrid chains using Srt2A and Srt5M (either with spacer leucine or without). Srt2A-generated K63-linked diUb is incubated with SUMO2 variants bearing a GGK moiety at K11, K21, K33, K35, K42 or K45 for generating isopeptide-linked hybrid chains or with a SUMO2 variant bearing an N-terminal GG-sequence for building a linearly-linked hybrid chain. **b**) SDS-PAGE analysis of formation of differently isopeptide-linked hybrid chains displaying AT and PT linkages. Srt2A-generated K63-diUb-H<sub>6</sub> (Ub(AT)-K63-Ub(PT)-H<sub>6</sub>) is incubated with SUMO2-KxGGK or SUMO2-KxBocK variants in the presence of Srt5M. Hybrid chain formation is dependent on the presence of the acceptor nucleophile GGK in SUMO2-KxGGK. In absence of SUMO2-KxGGK, hydrolysis of the Srt5M recognition motif and thereby cleavage of H<sub>6</sub>-tag of K63-diUb-H<sub>6</sub> is observed (denoted by '\*'). **c**) LC-MS analysis confirmed the integrity of the differently linked hybrid chains. Yields of sortylation were determined densitometrically using ImageJ from Supplementary Figure 6b: K11, 7 d, 35 %; K21, 7 d, 16 %; K33, 7 d, 41 %; K35, 7 d, 49 %; K42, 7 d; 44 %, K45, 7 d, 42 %. Consistent results were obtained over at least three replicate experiments.



## Supplementary Figure 7

**a**

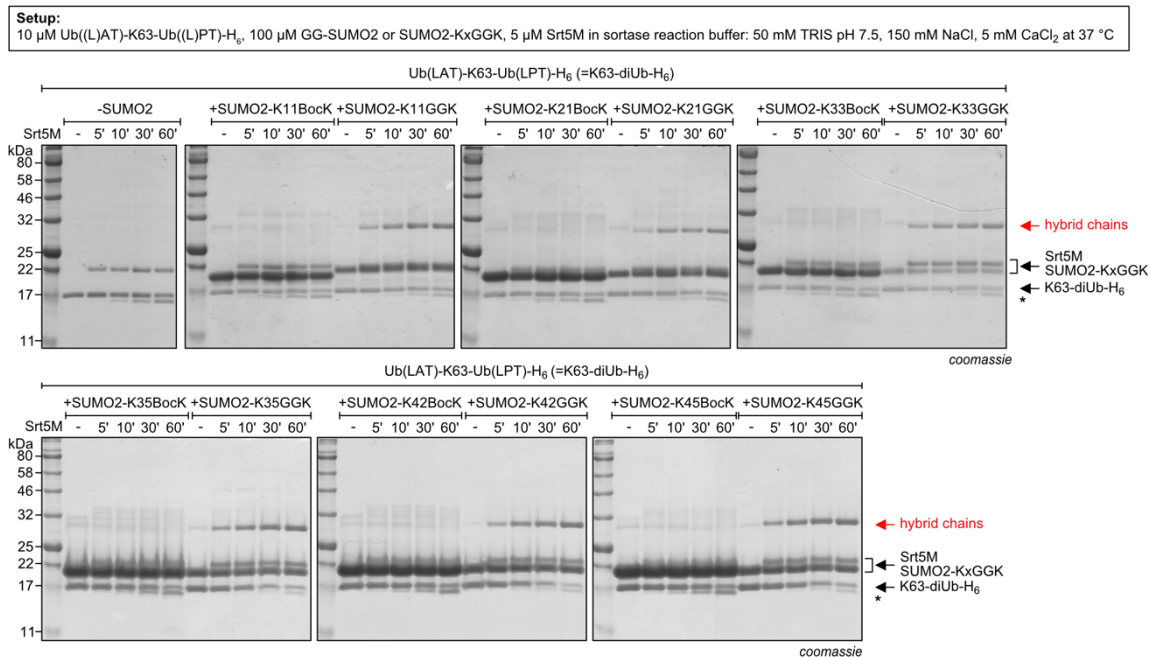

**b**

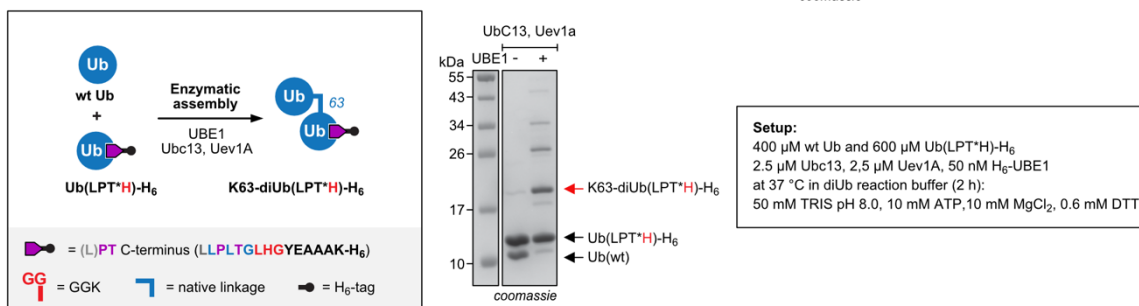

**c**

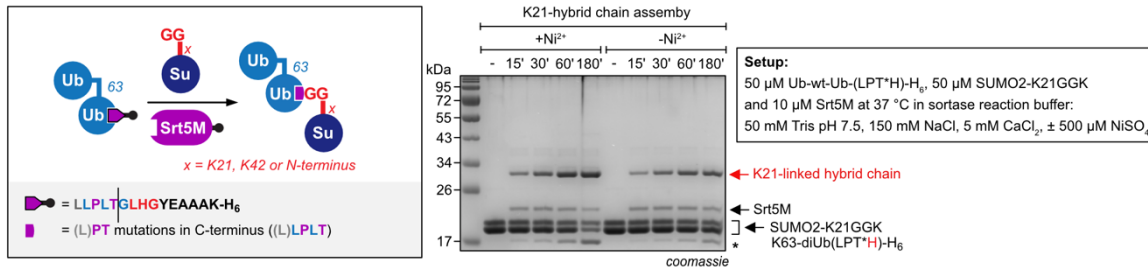

**d**

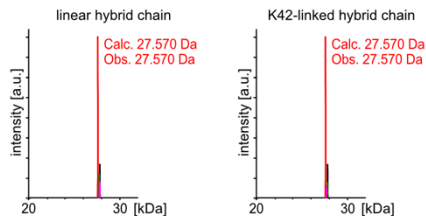

**Supplementary Figure 7. Generation of differently linked K63-diUb-SUMO2 hybrid chains via the orthogonal Srt2A/Srt5M pair and enzymatic assembly.** **a**) SDS-PAGE analysis of formation of differently isopeptide-linked hybrid chains. Srt2A-generated Ub(LAT)-K63-Ub(LPT)-H<sub>6</sub> is incubated with SUMO2-KxGGK or SUMO2-KxBocK variants in the presence of Srt5M. Hybrid chain formation is dependent on the presence of the acceptor nucleophile GGK in SUMO2-KxGGK. In absence of SUMO2-KxGGK, hydrolysis of the Srt5M recognition motif and thereby cleavage of H<sub>6</sub>-tag of K63-diUb-H<sub>6</sub> is observed (denoted by '\*'). **b**) Enzymatic assembly of natively linked K63-diUb. Ub wt is incubated with a Ub-variant bearing the Srt5M recognition motif (LLPLTG) lacking the C-terminal G76, followed by a short linker (LHGYEAAAK; dubbed

Ub(LPT\*H)-H<sub>6</sub>, in presence of the E1-enzyme UBE1 and the E2-enzymes Ubc13 and Uev1A. Ub(LPT\*H)-H<sub>6</sub> lacks G76 thereby guaranteeing orthogonality towards E1/E2-enzymes. Additionally, Ub(LPT\*H)-H<sub>6</sub> bears a GLHG motif that facilitates subsequent selective nucleophile quenching *via* Ni<sup>2+</sup> complexation to restrict the reversibility of the ligation reaction<sup>3</sup>. **c)** Assembly of diUb-SUMO2 hybrid chains containing the wt linker between the Ub moieties. Equimolar ratios of K63-diUb and SUMO2-K21GGK are incubated with Srt5M either in presence or absence of Ni<sup>2+</sup>. Selective nucleophile quenching increases hybrid chain yield by 1.5-fold when using equimolar concentration of diUb and SUMO2-GGK. (yields were determined densitometrically using ImageJ software (Wayne Rasband, National Institutes of Health, USA, <http://imagej.nih.gov/ij>). **d)** LC-MS analysis confirmed the identity of the linear and K42-linked hybrid chains.

Yields of sortylation were determined densitometrically using ImageJ from:

Supplementary Figure 7a: K11, 1 h, 55 %; K21, 1 h, 47 %; K33, 1 h, 56 %; K35, 1 h, 63 %; K42, 1 h; 65 %, K45, 1 h, 62 %.

Supplementary Figure 7c: +Ni<sup>2+</sup>, 3 h, 39 %; -Ni<sup>2+</sup>, 3 h, 28 %.

Consistent results were obtained over at least three replicate experiments.

Source data are provided as a Source Data file.

## Supplementary Figure 8

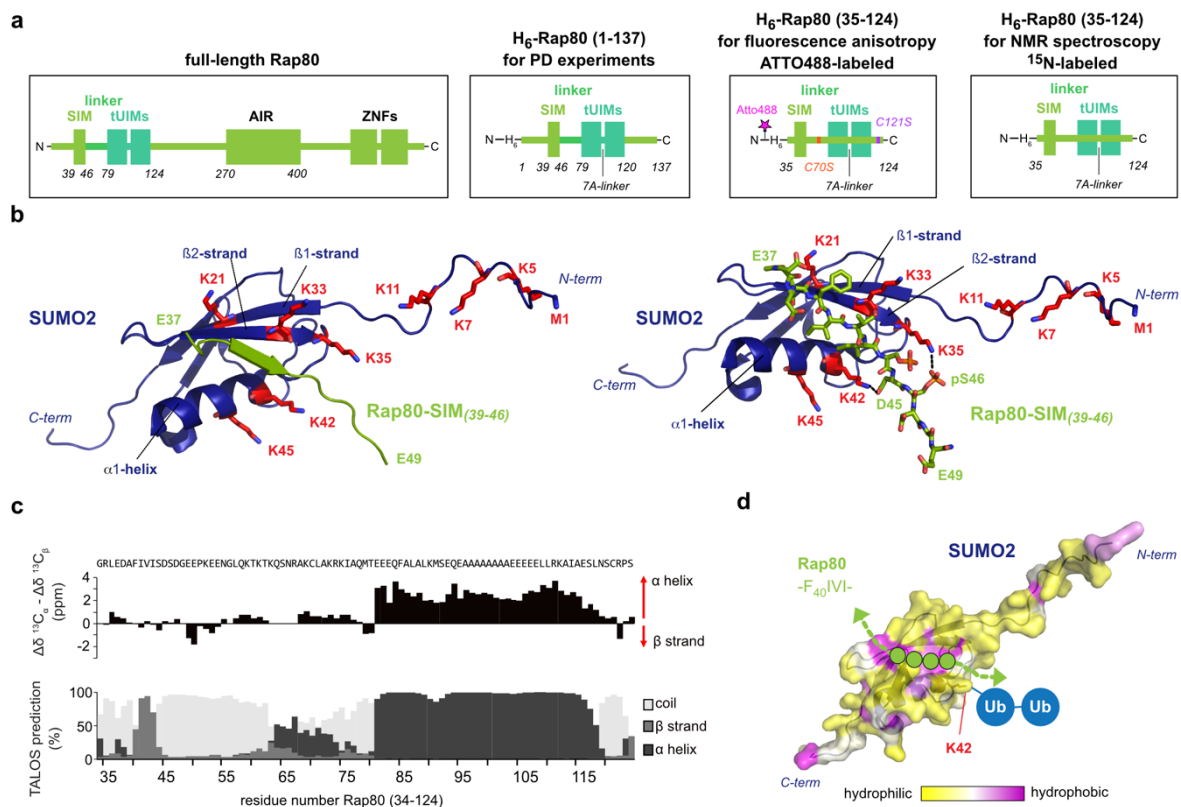

**Supplementary Figure 8. Rap80 engagement with K63-diUb-SUMO2 hybrid chains.** **a)** Overview of different Rap80 constructs used in this study. Rap80 is a 719-residue multidomain protein consisting of an N-terminal SUMO interacting motif (SIM ~residues 39-46) and tandem Ub-interacting motifs (tUIMs, ~residues 79-120) as well as a C-terminal part harbouring an Abraxas interacting region (AIR) and two putative zing fingers (ZNF). An N-terminally tagged Rap80 construct (residues 1-137) was used for pull-down (PD) experiments. It contains a 7A-linker between the two tUIMs (residues 97-103)<sup>4</sup>. For anisotropy experiments, the construct was shortened (residues 35-124), C70/C121 were mutated to serine and a cysteine was introduced N-terminally to the H<sub>6</sub>-tag for labelling with Atto488 maleimide. For NMR studies the Rap80<sub>(35-124)</sub> construct was used. **b)** Structural insights into the interaction between the N-terminal SIM of Rap80 and SUMO2. The flexible N-terminal region of SUMO2 harbouring lysine residues K5, K7 and K11 is not involved in binding of the SIM of Rap80. Interaction mainly occurs in a defined hydrophobic binding groove located between the  $\alpha_1$  helix and the  $\beta_2$  strand of the SUMO2 core. Lysine residues K33 (electrostatic interactions), K35 (interaction with Ser/pSer residues 44 and 46 of Rap80) and K42 (interaction with D45 of Rap80) were shown to be essential for the interaction with the SIM of Rap80. In contrast, lysine residues K21 (located in the  $\beta_1$  strand) and K45 of the SUMO2 core do not seem to be directly involved in the binding of the SIM of Rap80. The scheme is based on PDB: 2N9E<sup>5</sup>. **c)** <sup>13</sup>C secondary chemical shifts ( $\Delta\delta^{13}C_\alpha - \Delta\delta^{13}C_\beta$ ) (top panel) and TALOS+<sup>6</sup> secondary structure prediction from shifts (bottom panel) indicate a helical propensity for residues 62-79 preceding the performed  $\alpha$ -helical conformation of the tandem IUM including the 7A linker. **d)** Schematic representation of the parallel and anti-parallel binding mode of the SIM core motif F<sub>40</sub>IVI, represented as arrows, into the hydrophobic pocket (magenta) of SUMO2. K63-diUb linkage at K42 abolishes K42-D54 and K35-S46 interactions and sterically reduces the accessibility of the hydrophobic groove which hinders binding of Rap80 SIM in the preferred parallel conformation and leads to a small occupancy of the non-favoured antiparallel binding. This scheme is based on PDB: 2N9E<sup>5</sup>. Surface was coloured using hydrophobicity scale from Kyte and Doolittle<sup>7</sup>.

## Supplementary Figure 9

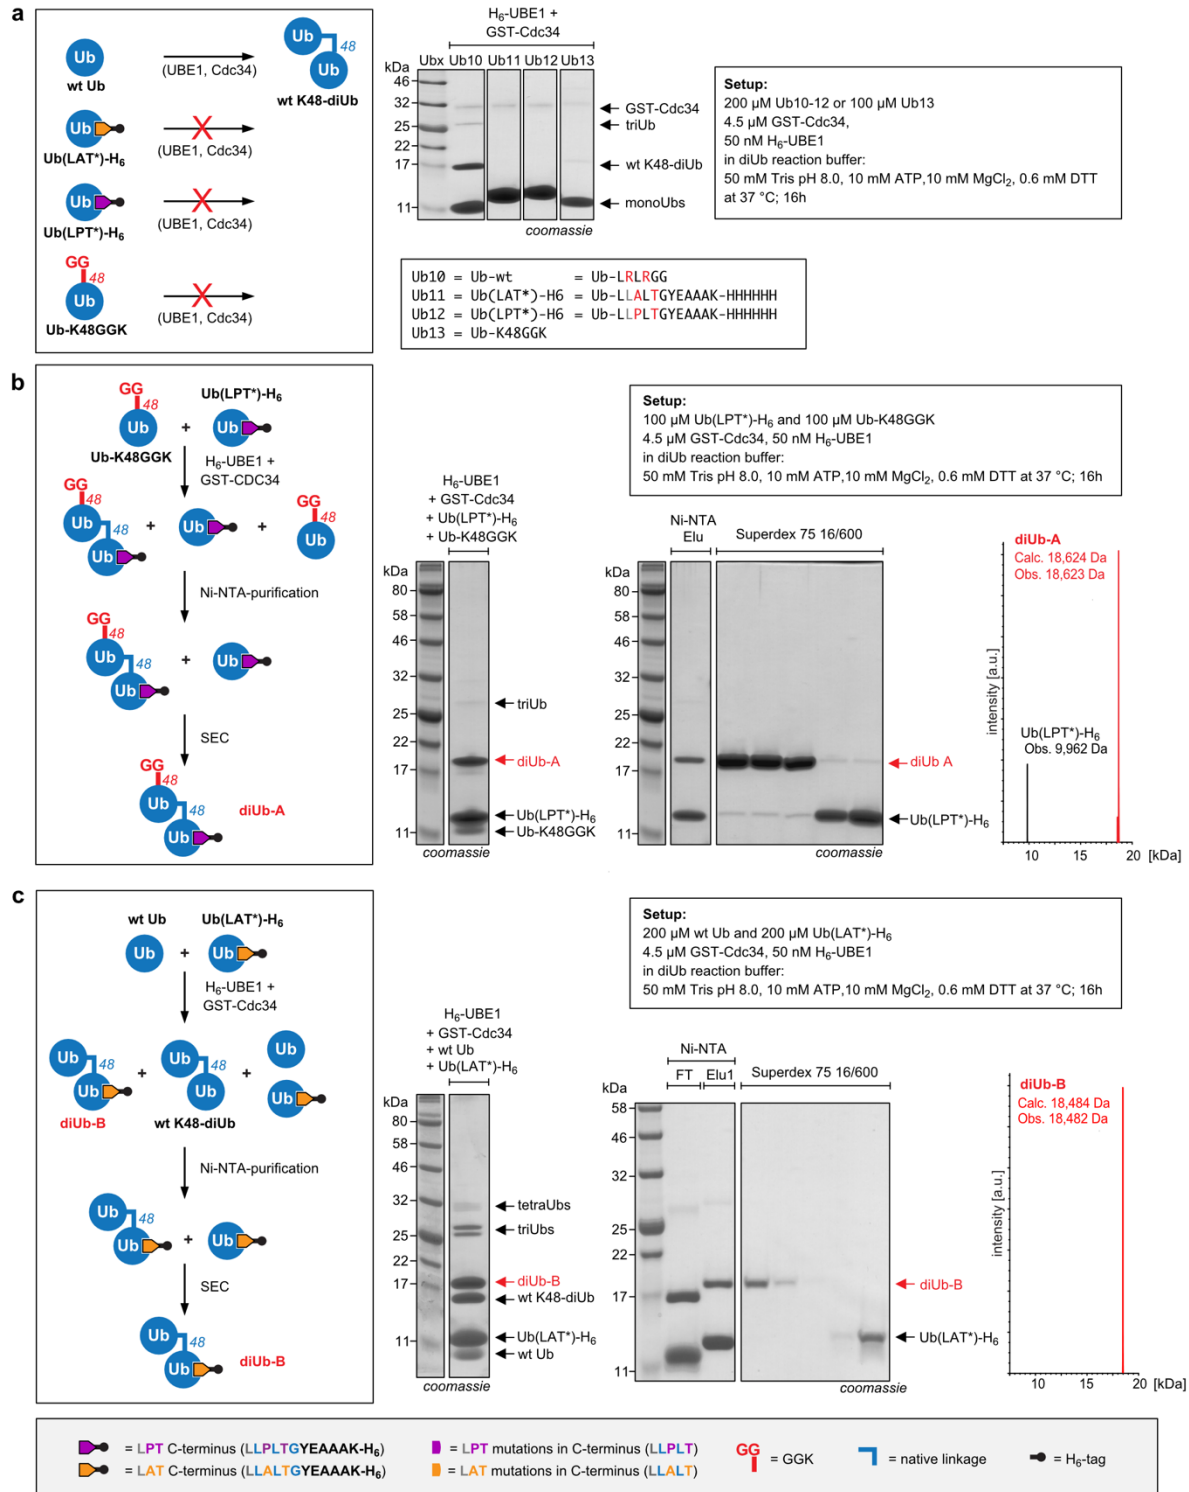

**Supplementary Figure 9. Enzymatic assembly of K48-linked diUbs for subsequent K48-tetraUb formation.**  
**a)** Overview of Ub building blocks used for the generation of diUb-A and diUb-B. Schematic representation (left) and SDS-PAGE analysis (right) of enzymatic K48-diUb formation using the E1 Ub-activating enzyme (UBE1) and the K48-linkage specific E2 Ub-conjugating enzyme (CDC34) and distinctly modified Ub monomers. Wt Ub shows di/tri Ub formation when incubated with UBE1 and CDC34, as both the C-terminus and K48 are accessible for Ub-conjugation. In contrast, Ub(LAT\*)-H<sub>6</sub> and Ub(LPT\*)-H<sub>6</sub> lack G76 at the C-terminus and display an additional YEAAAK sequence, rendering them ineffective for E1/E2-mediated enzymatic assembly to form K48-linked polyUbs. Ub-K48GGK bears GGK at K48 making it conjugation incompetent for enzymatic assembly of polyUbs using UBE1 and the K48-linkage specific CDC34. **b)** Enzymatic assembly and purification of diUb-A. SDS-PAGE analysis of overnight incubation of Ub(LPT\*)-H<sub>6</sub> and Ub-K48GGK in presence of UBE1 and CDC34

leads to formation of K48-linked diUb (with a minute amount of K48-triUb). Purification of diUb-A is performed using Ni-NTA chromatography followed by SEC (Superdex 75 16/600). LC-MS analysis confirms identity of diUb-A, but also shows that diUb-A contains residual Ub(LPT\*)-H<sub>6</sub> as impurity, which however cannot participate in the subsequent Srt2A-catalyzed transpeptidation reaction. **c)** Enzymatic assembly and purification of diUb-B. SDS-PAGE analysis of overnight incubation of wt Ub and Ub(LAT\*)-H<sub>6</sub> in the presence of UBE1 and CDC34 leads to formation of K48-linked di- and triUb species. Purification of diUb-B is performed by Ni-NTA chromatography followed by SEC (Superdex 75 16/600). LC-MS analysis confirms identity of diUb-B. Ni-NTA: Ni-Nitrilotriacetic acid, FT: flow-through, Elu: eluant. Consistent results were obtained over at least three replicate experiments. Source data are provided as a Source Data file.

## Supplementary Figure 10

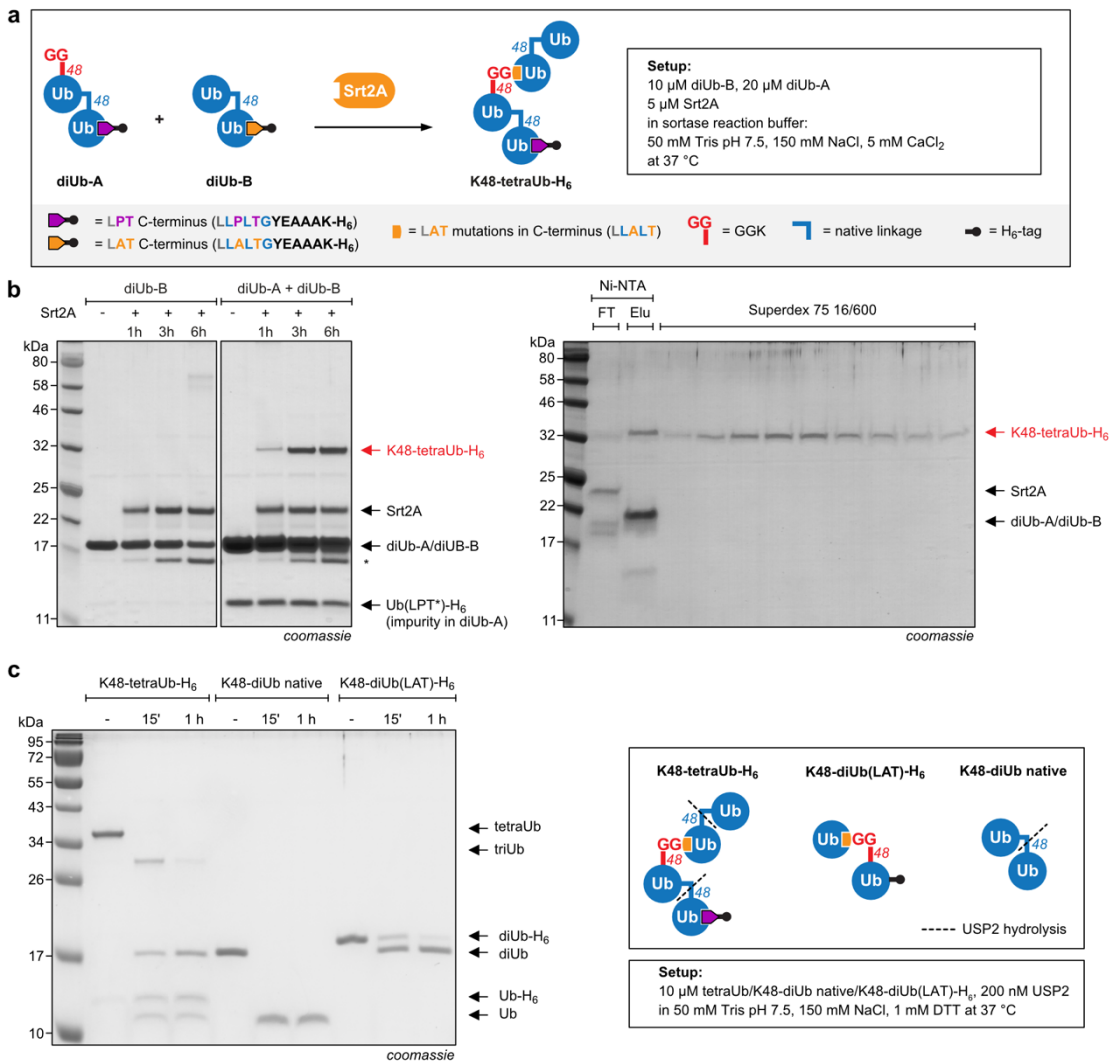

**Supplementary Figure 10. Sortase-mediated generation of a K48-linked tetraUb and hydrolysis assay with USP2.** **a)** Schematic representation of Srt2A-mediated tetraUb formation using enzymatically accessed diUb-A and diUb-B. **b)** Left: Incubation of diUb-A and diUb-B in presence of Srt2A leads to the formation of K48-linked tetraUb. TetraUb formation cannot be observed in the absence of diUb-B, confirming the orthogonality of Srt2A towards the Srt5M-recognition motif LPLTG. ‘\*’ denotes the hydrolysis product of the Srt2A- motif at the C-terminus of diUb-B in the absence of a GGK-acceptor nucleophile and thereby cleavage of the H<sub>6</sub>-tag. Right: Purification of K48-linked tetraUb is performed *via* Ni-NTA chromatography followed by SEC (Superdex 75 16/600). Ni-NTA: Ni-Nitrilotriacetic acid, FT: flow-through, Elu: Eluant. **c)** USP2 hydrolysis assays of K48-tetraUb-H<sub>6</sub>, wt K48-diUb and K48-diUb(LAT)-H<sub>6</sub>. Left: Treatment of sortase-generated K48-tetraUb-H<sub>6</sub> with USP2 yields K48-diUb(LAT), Ub(LPT)-H<sub>6</sub> and Ub(wt) as cleavage products. As expected, the ‘LAT/LPT’ linkages are recalcitrant towards cleavage by USP2. Control assays, in which K48-diUb native is treated with USP2 result in the formation of Ub(wt). Treatment of K48-diUb(LAT)-H<sub>6</sub> with USP2 leads to cleavage of the H<sub>6</sub>-tag of the proximal Ub, while the ‘LAT’ diUb linkage is resistant towards DUB hydrolysis. Yields of sortylation were determined densitometrically using ImageJ from: Supplementary Figure 10b: K48-tetraUb, 6 h, 37 %.

Consistent results were obtained over at least three replicate experiments.

Source data are provided as a Source Data file.

## Supplementary Figure 11

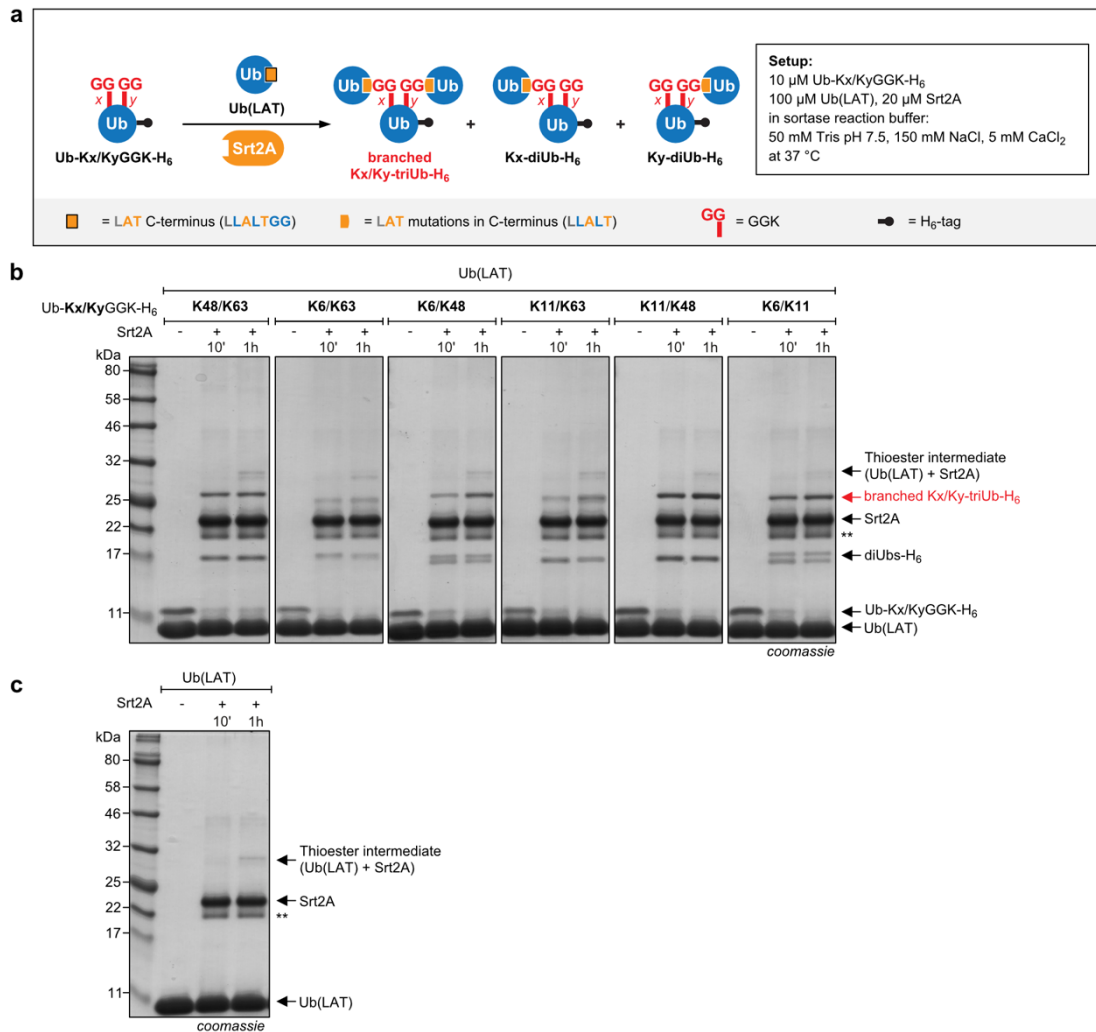

**Supplementary Figure 11. Generation of differently branched tri-Ubs.** **a)** Schematic representation of sortase-mediated assembly of branched tri-Ubs *via* incubation of Ub-Kx/KyGGK-H<sub>6</sub> with Ub(LAT) in the presence of Srt2A. **b)** SDS-PAGE analysis of incubation of different Ub-Kx/KyGGK-H<sub>6</sub> variants with Ub(LAT) and Srt2A shows formation of desired branched tri-Ubs as well as of both diUb intermediates. “\*\*” denotes an impurity present in Srt2A. **c)** Incubation of Ub(LAT) with Srt2A does not lead to di/triUb formation in the absence of a GGK-modified Ub. A slight band for Srt2A-Ub(LAT) thioester intermediate formation can be observed. “\*\*” denotes an impurity present in Srt2A.

Yields of sortylation were determined densitometrically using ImageJ from:

Supplementary Figure 11b: K48/K63, 1 h, 43 %; K6/K63, 1 h, 53 %; K6/K48, 1 h, 47 %; K11/K63, 1 h, 54 %; K11/K48, 1 h, 51 %; K6/K11, 1 h, 51 %.

Consistent results were obtained over at least three replicate experiments.

Source data are provided as a Source Data file.

## Supplementary Figure 12

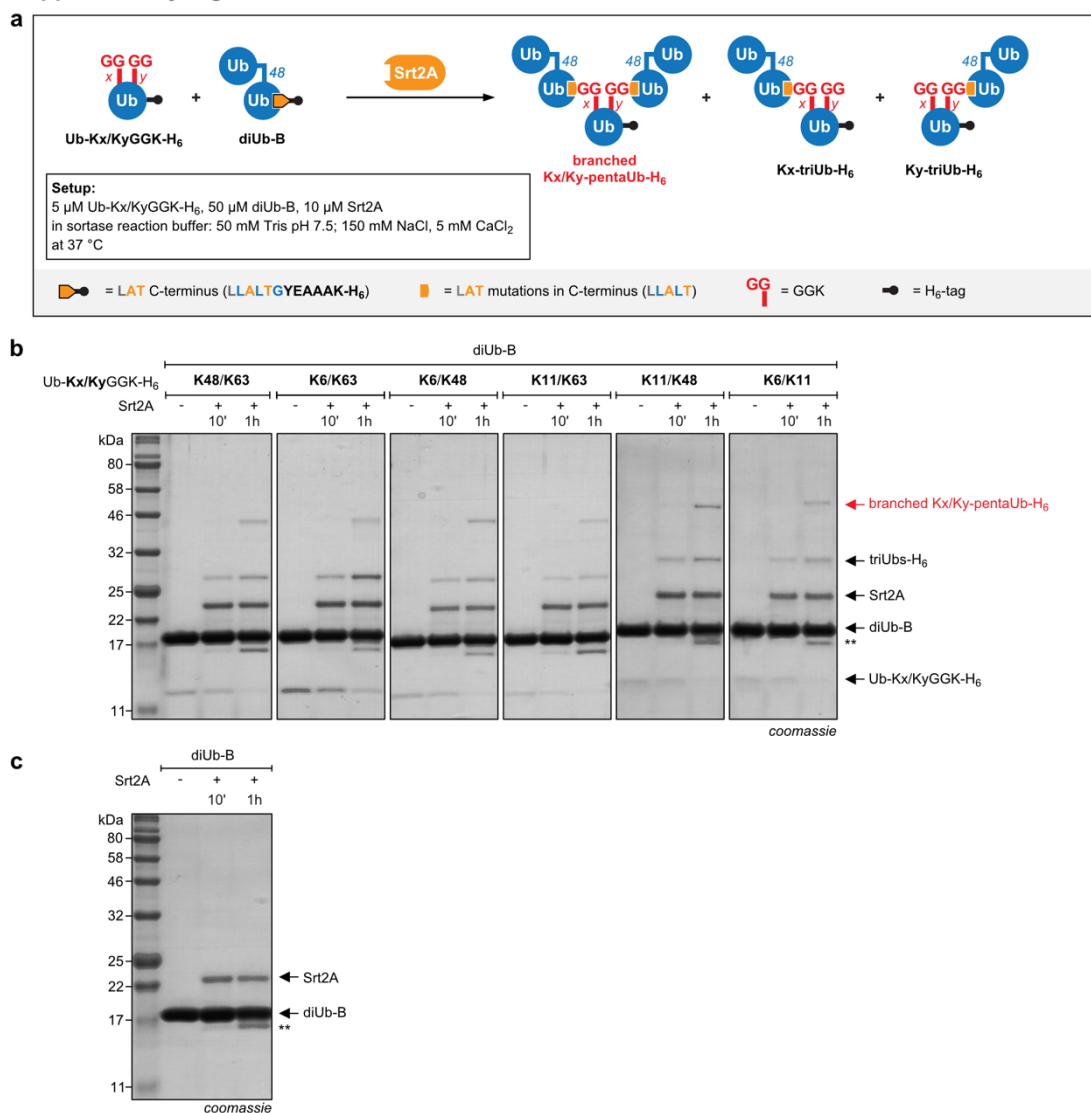

**Supplementary Figure 12. Generation of differently branched pentaUbs.** **a)** Schematic representation of sortase-mediated assembly of branched pentaUbs. **b)** Incubation of various Ub-Kx/KyGGK-H<sub>6</sub> with diUb-B in the presence of Srt2A leads to formation of the desired branched pentaUb and both triUb intermediates, as shown by SDS-PAGE analysis. “\*\*” denotes impurity present in Srt2A preparation. **c)** Incubation of diUb-B with Srt2A in the absence of GGK-modified Ub does not lead to tri/pentaUb formation. “\*\*” denotes impurity present in Srt2A. Yields of sortylation were determined densitometrically using ImageJ from:

Supplementary Figure 12b: K48/K63, 1 h, 35 %; K6/K63, 1 h, 19 %; K6/K48, 1 h, 39 %; K11/K63, 1 h, 38 %; K11/K48, 1 h, 41 %; K6/K11, 1 h, 27 %.

Consistent results were obtained over at least three replicate experiments.

Source data are provided as a Source Data file.



### Supplementary Figure 13

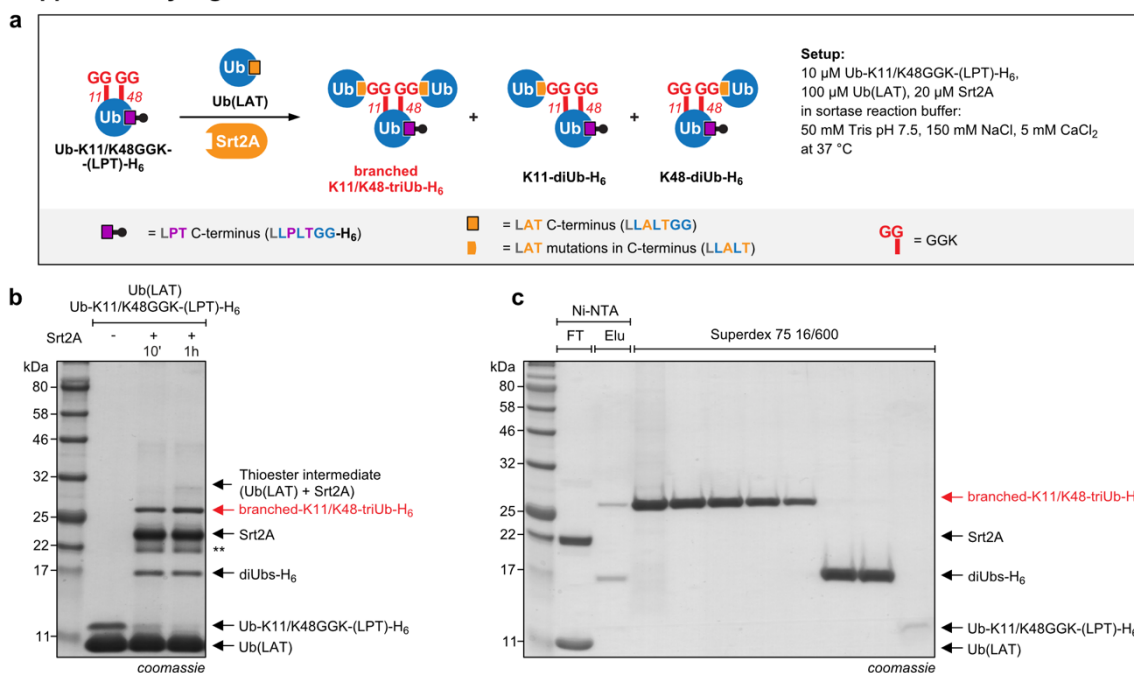

**Supplementary Figure 13. Generation and purification of the K11/K48-branched triUb.** **a)** Schematic representation of sortase-mediated assembly of the K11/K48 branched triUb used for POI charging. To site-specifically attach the triUb onto a POI, the starting Ub-K<sub>x</sub>/K<sub>y</sub>GGK-H<sub>6</sub> building block was equipped with a C-terminal Srt5M recognition motif. **b)** Incubation of Ub-K11/K48GGK-(LPT)-H<sub>6</sub> with Ub(LAT) in the presence of Srt2A leads to formation of the desired branched triUb and both diUb intermediates. ‘\*\*\*’ denotes impurity present in Srt2A. **c)** Purification of the K11/K48 branched triUb using Ni-NTA chromatography followed by SEC (Superdex 75 16/600). Ni-NTA: Ni-Nitrilotriacetic acid, FT: flowthrough, Elu: eluant.

Yields of sortylation were determined densitometrically using ImageJ from Supplementary Figure 13b: K11/K48, 1 h, 54 %.

Consistent results were obtained over at least three replicate experiments.

Source data are provided as a Source Data file.

## Supplementary Tables

Supplementary Table 1. Primers for introduction of TAG mutants

| Construct                               | Primer   | Sequence (5' => 3')                                    |
|-----------------------------------------|----------|--------------------------------------------------------|
| <b>pPylT_SUMO2-K11TAG-H<sub>6</sub></b> | Short Fw | ACCGAAAACAACGATCATATTAACCTGAAAAGT                      |
|                                         | Short Rv | TTCATCCGCCATGGTTAATTCCTCCT                             |
|                                         | Tail Fw  | AAACCGAAAGAAGGCGTGTAGACCGAAAACAACGATCATATTAACCTGAAAAGT |
|                                         | Tail Rv  | CTACACGCCTTCTTTCGGTTTTTCATCCGCCATGGTTAATTCCTCCT        |
| <b>pPylT_SUMO2-K21TAG-H<sub>6</sub></b> | Short Fw | GTGGCGGGCCAGGATG                                       |
|                                         | Short Rv | ATGATCGTTGTTTTCGGTCTACACGC                             |
|                                         | Tail Fw  | ATTAACCTGTAGGTGGCGGGCCAGGATG                           |
|                                         | Tail Rv  | CTACAGGTAAATATGATCGTTGTTTTCGGTCTACACGC                 |
| <b>pPylT_SUMO2-K33TAG-H<sub>6</sub></b> | Short Fw | CATACCCCGCTGAGCAAAGTGA                                 |
|                                         | Short Rv | AAACTGCACCACGCTGCCA                                    |
|                                         | Tail Fw  | TAGATTAACGCCATACCCCGCTGAGCAAAGTGA                      |
|                                         | Tail Rv  | GCGTTTAATCTAAAAGTGCACCACGCTGCCA                        |
| <b>pPylT_SUMO2-K35TAG-H<sub>6</sub></b> | Short Fw | CATACCCCGCTGAGCAAAGTGA                                 |
|                                         | Short Rv | AAACTGCACCACGCTGCCA                                    |
|                                         | Tail Fw  | AAAATTTAGCGCCATACCCCGCTGAGCAAAGTGA                     |
|                                         | Tail Rv  | GCGCTAAATTTTAAAAGTGCACCACGCTGCCA                       |
| <b>pPylT_SUMO2-K42TAG-H<sub>6</sub></b> | Short Fw | GCGTATTGCGAACGCCAGG                                    |
|                                         | Short Rv | GCTCAGCGGGGTATGGCG                                     |
|                                         | Tail Fw  | TAGCTGATGAAAGCGTATTGCGAACGCCAGG                        |
|                                         | Tail Rv  | TTTCATCAGCTAGCTCAGCGGGGTATGGCG                         |
| <b>pPylT_SUMO2-K45TAG-H<sub>6</sub></b> | Short Fw | GCGTATTGCGAACGCCAGG                                    |
|                                         | Short Rv | GCTCAGCGGGGTATGGCG                                     |
|                                         | Tail Fw  | AAACTGATGTAGGCGTATTGCGAACGCCAGG                        |
|                                         | Tail Rv  | CTACATCAGTTTGCTCAGCGGGGTATGGCG                         |
| <b>pPylT_Ub-K6TAG-H<sub>6</sub></b>     | Short Fw | ACCATCACTCTCGAAGTGGAGC                                 |
|                                         | Short Rv | CACGAAGATCTGCATGGTTAATTCCTCC                           |
|                                         | Tail Fw  | TAGACCCTGACTGGTAAGACCATCACTCTCGAAGTGGAGC               |
|                                         | Tail Rv  | CTTACCAGTCAGGGTCTACACGAAGATCTGCATGGTTAATTCCTCC         |
| <b>pPylT_Ub-K11TAG-H<sub>6</sub></b>    | Short Fw | ACCATCACTCTCGAAGTGGAGC                                 |
|                                         | Short Rv | CACGAAGATCTGCATGGTTAATTCCTCC                           |
|                                         | Tail Fw  | AAGACCCTGACTGGTTAGACCATCACTCTCGAAGTGGAGC               |

---

|         |                                                 |
|---------|-------------------------------------------------|
| Tail Rv | CTAACCAGTCAGGGTCTTACACGAAGATCTGCATGGTTAATTCCTCC |
|---------|-------------------------------------------------|

|                                             |          |                                                |
|---------------------------------------------|----------|------------------------------------------------|
| <b>pPyIT_Ub-<br/>K6/11TAG-H<sub>6</sub></b> | Short Fw | ACCATCACTCTCGAAGTGGAGC                         |
|                                             | Short Rv | CACGAAGATCTGCATGGTTAATTCCTCC                   |
|                                             | Tail Fw  | TAGACCCTGACTGGTTAGACCATCACTCTCGAAGTGGAGC       |
|                                             | Tail Rv  | CTAACCAGTCAGGGTCTACACGAAGATCTGCATGGTTAATTCCTCC |

|                                           |          |                                     |
|-------------------------------------------|----------|-------------------------------------|
| <b>pPyIT_Ub-<br/>K48TAG-H<sub>6</sub></b> | Short Fw | CAGCTGGAAGATGGACGCAC                |
|                                           | Short Rv | GATCAACCTCTGCTGGTCAGGAG             |
|                                           | Tail Fw  | TTTGCTGGGTAGCAGCTGGAAGATGGACGCAC    |
|                                           | Tail Rv  | CTACCCAGCAAAGATCAACCTCTGCTGGTCAGGAG |

|                                           |          |                                |
|-------------------------------------------|----------|--------------------------------|
| <b>pPyIT_Ub-<br/>K63TAG-H<sub>6</sub></b> | Short Fw | CTGCACCTGGTCCTCCGTCTCA         |
|                                           | Short Rv | CTGGATGTTGTAGTCAGACAGGGT       |
|                                           | Tail Fw  | TAGGAGTCCACCCTGCACCTGGTCCTCCGT |
|                                           | Tail Rv  | GGTGGACTCCTACTGGATGTTGTAGTCAGA |

---

**Supplementary Table 2. Primers for introduction of sortase motifs**

| <b>Construct</b>      | <b>Primer</b> | <b>Sequence (5' =&gt; 3')</b>                |
|-----------------------|---------------|----------------------------------------------|
| <b>pET17b_Ub(PS)</b>  | Short Fw      | GGTGGGTGATAAGAATTCTGCAGATATCC                |
|                       | Short Rv      | GACCAGGTGCAGGGTGGAC                          |
|                       | Tail Fw       | CTCCCGCTCAGCGGTGGGTGATAAGAATTCTGCAGATATCC    |
|                       | Tail Rv       | GCTGAGCGGGAGGACCAGGTGCAGGGTGGAC              |
| <b>pET17b_Ub(LPS)</b> | Short Fw      | GGTGGGTGATAAGAATTCTGCAGATATCC                |
|                       | Short Rv      | GACCAGGTGCAGGGTGGAC                          |
|                       | Tail Fw       | CTGCTCCCGCTCAGCGGTGGGTGATAAGAATTCTGCAGATATCC |
|                       | Tail Rv       | GCTGAGCGGGAGCAGGACCAGGTGCAGGGTGGAC           |
| <b>pET17b_Ub(PT)</b>  | Short Fw      | GGTGGGTGATAAGAATTCTGCAGATATCC                |
|                       | Short Rv      | GACCAGGTGCAGGGTGGAC                          |
|                       | Tail Fw       | CTCCCGCTCACCGGTGGGTGATAAGAATTCTGCAGATATCC    |
|                       | Tail Rv       | GGTGAGCGGGAGGACCAGGTGCAGGGTGGAC              |
| <b>pET17b_Ub(LPT)</b> | Short Fw      | GGTGGGTGATAAGAATTCTGCAGATATCC                |
|                       | Short Rv      | GACCAGGTGCAGGGTGGAC                          |
|                       | Tail Fw       | CTGCTCCCGCTCACCGGTGGGTGATAAGAATTCTGCAGATATCC |
|                       | Tail Rv       | GGTGAGCGGGAGCAGGACCAGGTGCAGGGTGGAC           |
| <b>pET17b_Ub(AT)</b>  | Short Fw      | GGTGGGTGATAAGAATTCTGCAGATATCC                |
|                       | Short Rv      | GACCAGGTGCAGGGTGGAC                          |
|                       | Tail Fw       | CTCGCTCTCACCGGTGGGTGATAAGAATTCTGCAGATATCC    |
|                       | Tail Rv       | GGTGAGAGCGAGGACCAGGTGCAGGGTGGAC              |
| <b>pET17b_Ub(LAT)</b> | Short Fw      | GGTGGGTGATAAGAATTCTGCAGATATCC                |
|                       | Short Rv      | GACCAGGTGCAGGGTGGAC                          |
|                       | Tail Fw       | CTGCTCGCTCTCACCGGTGGGTGATAAGAATTCTGCAGATATCC |
|                       | Tail Rv       | GGTGAGAGCGAGCAGGACCAGGTGCAGGGTGGAC           |

**Supplementary Table 3. Plasmids**

| <b>Plasmid</b>                              | <b>Description</b>                                                                                                                                                      |
|---------------------------------------------|-------------------------------------------------------------------------------------------------------------------------------------------------------------------------|
| <b>pBK_AzGGKRS</b>                          | <i>M. bakeri</i> AzGGK aminoacyl-tRNA-synthetase (aaRS) under a constitutive GlnS promoter.                                                                             |
| <b>pBK_wt_RS</b>                            | <i>M. bakeri</i> wt aaRS under a constitutive GlnS promoter.                                                                                                            |
| <b>pPylT_sfGFP-N150TAG-H<sub>6</sub></b>    | sfGFP-N150TAG-H <sub>6</sub> under an arabinose promoter with a C-terminal H <sub>6</sub> -tag and a PylT copy under a constitutive promoter.                           |
| <b>pPylT_UbK6TAG-H<sub>6</sub></b>          | UbK6TAG-H <sub>6</sub> under an arabinose promoter with a C-terminal H <sub>6</sub> -tag and a PylT copy under a constitutive promoter.                                 |
| <b>pPylT_UbK48TAG-H<sub>6</sub></b>         | UbK48TAG-H <sub>6</sub> under an arabinose promoter with a C-terminal H <sub>6</sub> -tag and a PylT copy under a constitutive promoter.                                |
| <b>pPylT_UbK48TAG-(LPT)-H<sub>6</sub></b>   | UbK48TAG-H <sub>6</sub> with LLPLTGG C-terminus followed by a C-terminal H <sub>6</sub> -tag under an arabinose promoter and a PylT copy under a constitutive promoter. |
| <b>pPylT_UbK63TAG-(PT)-H<sub>6</sub></b>    | UbK63TAG-H <sub>6</sub> with LPLTGG C-terminus under an arabinose promoter with a C-terminal H <sub>6</sub> -tag and a PylT copy under a constitutive promoter.         |
| <b>pPylT_UbK63TAG-(LPT)-H<sub>6</sub></b>   | UbK63TAG-H <sub>6</sub> with LLPLTGG C-terminus followed by a C-terminal H <sub>6</sub> -tag under an arabinose promoter and a PylT copy under a constitutive promoter. |
| <b>pPylT_Ub-KxxTAG-KyyTAG-H<sub>6</sub></b> | UbKxxTAG-KyyTAG with a C-terminal H <sub>6</sub> -tag under an arabinose promoter and a PylT copy under a constitutive promoter.                                        |
| <b>pPylT_SUMO2-KxxTAG-H<sub>6</sub></b>     | SUMO2KxxTAG with a C-terminal H <sub>6</sub> -tag under an arabinose promoter and a PylT copy under a constitutive promoter.                                            |
| <b>pET29b_Srt4S-H<sub>6</sub></b>           | Srt4S under an IPTG inducible T7 Promotor with a C-terminal H <sub>6</sub> -tag.                                                                                        |
| <b>pET29b_Srt5M-H<sub>6</sub></b>           | Srt5M under an IPTG inducible T7 Promotor with a C-terminal H <sub>6</sub> -tag.                                                                                        |
| <b>pET29b_Srt2A-H<sub>6</sub></b>           | Srt2A under an IPTG inducible T7 Promotor with a C-terminal H <sub>6</sub> -tag.                                                                                        |
| <b>pET29b_Srt4S-TEV-H<sub>6</sub></b>       | Srt4S with a C-terminal TEV-site followed by a H <sub>6</sub> -tag under an IPTG inducible T7 Promotor with a C-terminal H <sub>6</sub> -tag.                           |
| <b>pET29b_Srt5M-TEV-H<sub>6</sub></b>       | Srt5M with a C-terminal TEV-site followed by a H <sub>6</sub> -tag under an IPTG inducible T7 Promotor with a C-terminal H <sub>6</sub> -tag.                           |

|                                                              |                                                                                                                                                                           |
|--------------------------------------------------------------|---------------------------------------------------------------------------------------------------------------------------------------------------------------------------|
| <b>pET29b_Srt2A-TEV-H<sub>6</sub></b>                        | Srt2A with a C-terminal TEV-site followed by a H <sub>6</sub> -tag under an IPTG inducible T7 Promotor with a C-terminal H <sub>6</sub> -tag.                             |
| <b>pET17b_H<sub>6</sub>-Rap80(1-137)_7A_Link</b>             | Rap80(1-137)_7A_Link with an C-terminal H <sub>6</sub> -tag under an IPTG inducible T7 Promotor (used for pull-down experiments).                                         |
| <b>pET17b_H<sub>6</sub>-Rap80(35-124)_7A_Link_C70S_C120S</b> | Rap80(35-124)_7A_Link with C70S/C120S mutations and an C-terminal H <sub>6</sub> -tag under an IPTG inducible T7 Promotor (used for fluorescence anisotropy experiments). |
| <b>pET17b_H<sub>6</sub>-Rap80(35-124)_7A_Link</b>            | Rap80(35-124)_7A_Link with an C-terminal H <sub>6</sub> -tag under an IPTG inducible T7 Promotor (used for NMR experiments).                                              |
| <b>pET17b_H<sub>6</sub>-TEV-G-SUMO2</b>                      | SUMO2 with an N-terminal H <sub>6</sub> -tag followed by a TEV site and an additional glycine under an IPTG inducible T7 Promotor.                                        |
| <b>pET17b_Ub_wt</b>                                          | Ubiquitin wt under an IPTG inducible T7 Promotor.                                                                                                                         |
| <b>pET17b_Ub_wt-H<sub>6</sub></b>                            | Ubiquitin wt with C-terminal H <sub>6</sub> -tag under an IPTG inducible T7 Promotor.                                                                                     |
| <b>pET17b_Ub(PS)</b>                                         | Ubiquitin with C-terminus LPLSGG under an IPTG inducible T7 Promotor.                                                                                                     |
| <b>pET17b_Ub(LPS)</b>                                        | Ubiquitin with C-terminus LLPLSGG under an IPTG inducible T7 Promotor.                                                                                                    |
| <b>pET17b_Ub(PT)</b>                                         | Ubiquitin with C-terminus LPLTGG under an IPTG inducible T7 Promotor.                                                                                                     |
| <b>pET17b_Ub(PT)-H<sub>6</sub></b>                           | Ubiquitin with C-terminus LPLTGG followed by an H <sub>6</sub> -tag under an IPTG inducible T7 Promotor.                                                                  |
| <b>pET17b_Ub(LPT)</b>                                        | Ubiquitin with C-terminus LLPLTGG under an IPTG inducible T7 Promotor.                                                                                                    |
| <b>pET17b_Ub(LPT)-H<sub>6</sub></b>                          | Ubiquitin with C-terminus LLPLTGG followed by an H <sub>6</sub> -tag under an IPTG inducible T7 Promotor.                                                                 |
| <b>pET17b_Ub(AT)</b>                                         | Ubiquitin with C-terminus LALTGG under an IPTG inducible T7 Promotor.                                                                                                     |
| <b>pET17b_Ub(AT)-H<sub>6</sub></b>                           | Ubiquitin with C-terminus LALTGG followed by an H <sub>6</sub> -tag under an IPTG inducible T7 Promotor.                                                                  |
| <b>pET17b_Ub(LAT)</b>                                        | Ubiquitin with C-terminus LLALTGG under an IPTG inducible T7 Promotor.                                                                                                    |

|                                       |                                                                                                                                           |
|---------------------------------------|-------------------------------------------------------------------------------------------------------------------------------------------|
| <b>pET17b_Ub(LAT)-H<sub>6</sub></b>   | Ubiquitin with C-terminus LLALTGG followed by an H <sub>6</sub> -tag under an IPTG inducible T7 Promotor.                                 |
| <b>pET17b_Ub(LAT*)-H<sub>6</sub></b>  | Ubiquitin with C-terminus LLALTGYEAAAK followed by a H <sub>6</sub> -tag under an IPTG inducible T7 Promotor.                             |
| <b>pET17b_Ub(LPT*)-H<sub>6</sub></b>  | Ubiquitin with C-terminus LLPLTGYEAAAK followed by a H <sub>6</sub> -tag under an IPTG inducible T7 Promotor.                             |
| <b>pET17b_Ub(LPT*H)-H<sub>6</sub></b> | Ubiquitin with C-terminus LLPLTGLHGYEAAAK followed by a H <sub>6</sub> -tag under an IPTG inducible T7 Promotor.                          |
| <b>pGEX-6P-1-UBE2R1</b>               | GST-UBE2R1 (Cdc34) under an IPTG inducible T7 Promotor.                                                                                   |
| <b>pGEX-6P-1-UBE2N</b>                | GST-UBE2N (Ubc13) under an IPTG inducible T7 Promotor                                                                                     |
| <b>pGEX-6P-1-UBE2V1</b>               | GST-UBE2V1 (Uev1A) under an IPTG inducible T7 Promotor                                                                                    |
| <b>pET28a_H<sub>6</sub>-Thr-USP2</b>  | Catalytic domain of USP2 with an N-terminal H <sub>6</sub> -tag followed by a thrombin cleavage site under an IPTG inducible T7 Promotor. |
| <b>pET28a_H<sub>6</sub>-Thr-SEN2</b>  | Catalytic domain of SEN2 H <sub>6</sub> -tag followed by a thrombin cleavage site under an IPTG inducible T7 Promotor.                    |
| <b>pET28a_H<sub>6</sub>-Thr-UCHL3</b> | UCHL3 with an N-terminal H <sub>6</sub> -tag followed by a thrombin cleavage site under an IPTG inducible T7 Promotor                     |

## Supplementary Notes

### Supplementary Note 1: Amino acid sequences of proteins

---

#### AzGGKRS (mutations: L274A, N311Q, C313S)

MDKKPLDVLISATGLWMSRTGTLHKIKHHEVSRSKIYIEMACGDHLVVNNSRSCRTARAFRHHKYRKT  
CKRCRVSDDEDINNFLTRSTESKNSVKVRVVSAPKVKKAMPKSVSRAPKPLENSVSAKASTNTSRVSPSP  
AKSTPNSSVPASAPAPSLTRSQLDRVEALLSPEDKISLNMAMPFRELEPELVTRRKNDFQRLYTNDREY  
LGKLERDITKFFVDRGFLEIKSPILIPAEYVERMGINNDELKQIFRVDKNLCLRPMLAPTLYNYARKLD  
RILPGPIKIFEVGPCYRKESDQKEHLEEFMTVQFSQMGSGCTRENLEALIKEFLDYLEIDFEIVGDSCMVY  
GDTLDMHGDLELSSAVVGPVSLDREWGIDKPWIGAGFGLERLLKVMHGFKNIKRASRSSESYNGISTN  
L\*

#### wt RS

MDKKPLDVLISATGLWMSRTGTLHKIKHHEVSRSKIYIEMACGDHLVVNNSRSCRTARAFRHHKYRKT  
CKRCRVSDDEDINNFLTRSTESKNSVKVRVVSAPKVKKAMPKSVSRAPKPLENSVSAKASTNTSRVSPSP  
AKSTPNSSVPASAPAPSLTRSQLDRVEALLSPEDKISLNMAMPFRELEPELVTRRKNDFQRLYTNDREY  
LGKLERDITKFFVDRGFLEIKSPILIPAEYVERMGINNDELKQIFRVDKNLCLRPMLAPTLYNYLRKLD  
RILPGPIKIFEVGPCYRKESDQKEHLEEFMTVNFQMGSGCTRENLEALIKEFLDYLEIDFEIVGDSCMVY  
GDTLDMHGDLELSSAVVGPVSLDREWGIDKPWIGAGFGLERLLKVMHGFKNIKRASRSSESYNGISTN  
L\*

#### sfGFP-N150TAG-H<sub>6</sub>

MPSKGEELFTGVVPIVVELDGDVNGHKFSVRGEGEGDATNGKLTCLKFICTTGKLPVPWPTLVTTLTLYGV  
QCFSRYPDHMKRHDFFKSAMPEGYVQERTISFKDDGTYKTRAEVKFEGDTLVNRIELKGFDFKEDGNIL  
GHKLEYNFNSH\*VYITADKQKNGIKANFKIRHNVEDGSVQLADHYQQNTPIGDGPVLLPDNHYLSTQS  
VLSKDPNEKRDHMLLEFVTAAGITHGMDELYKGSHHHHHH

#### Ubiquitin-K6TAG-H<sub>6</sub>

MQIFV\*TLTGKTITLEVEPSDTIENVKAKIQDKEGIPPDQQLIFAGKQLEDGRTLSDYNIQKESTLHLVLR  
LRGGHHHHHH\*

#### Ubiquitin-K48TAG-H<sub>6</sub>

MQIFVKTLTGKTITLEVEPSDTIENVKAKIQDKEGIPPDQQLIFAG\*QLEDGRTLSDYNIQKESTLHLVLR  
LRGGHHHHHH\*

#### Ubiquitin-K48TAG-(LPT)-H<sub>6</sub>

MQIFVKTLTGKTITLEVEPSDTIENVKAKIQDKEGIPPDQQLIFAG\*QLEDGRTLSDYNIQKESTLHLVLL  
PLTGGHHHHHH\*

#### Ubiquitin-K63TAG-(PT)-H<sub>6</sub>

MQIFVKTLTGKTITLEVEPSDTIENVKAKIQDKEGIPPDQQLIFAGKQLEDGRTLSDYNIQ\*ESTLHLVLR  
LTGGHHHHHH\*

#### Ubiquitin-K63TAG-(LPT)-H<sub>6</sub>

MQIFVKTLTGKTITLEVEPSDTIENVKAKIQDKEGIPPDQQLIFAGKQLEDGRTLSDYNIQ\*ESTLHLVLL  
PLTGGHHHHHH\*

#### Ubiquitin-K48TAG-K63TAG-H<sub>6</sub>

MQIFVKTLTGKTITLEVEPSDTIENVKAKIQDKEGIPPDQQLIFAG\*QLEDGRTLSDYNIQ\*ESTLHLVLR  
LRGGHHHHHH\*

#### Ubiquitin-K6TAG-K63TAG-H<sub>6</sub>

MQIFV\*TLTGKTITLEVEPSDTIENVKAKIQDKEGIPPDQQLIFAGKQLEDGRTLSDYNIQ\*ESTLHLVLR  
LRGGHHHHHH\*

#### Ubiquitin-K6TAG-K48TAG-H<sub>6</sub>

MQIFV\*TLTGKTITLEVEPSDTIENVKAKIQDKEGIPPDQQLIFAG\*QLEDGRTLSDYNIQKESTLHLVLR  
LRGGHHHHHH\*



**Ubiquitin-K11TAG-K63TAG-H<sub>6</sub>**

MQIFVKTLTG\*TITLEVEPSDTIENVKAKIQDKEGIPPDQQLIFAGKQLEDGRTLSDYNIQ\*ESTLHLVLR  
LRGGHHHHHH\*

**Ubiquitin-K11TAG-K48TAG-H<sub>6</sub>**

MQIFVKTLTG\*TITLEVEPSDTIENVKAKIQDKEGIPPDQQLIFAG\*QLEDGRTLSDYNIQKESTLHLVLR  
LRGGHHHHHH\*

**Ubiquitin-K6TAG-K11TAG-H<sub>6</sub>**

MQIFV\*TLTG\*TITLEVEPSDTIENVKAKIQDKEGIPPDQQLIFAGKQLEDGRTLSDYNIQKESTLHLVLR  
LRGGHHHHHH\*

**Ubiquitin-K11TAG-K48TAG-(LPT)-H<sub>6</sub>**

MQIFVKTLTG\*TITLEVEPSDTIENVKAKIQDKEGIPPDQQLIFAG\*QLEDGRTLSDYNIQKESTLHLVLL  
PLTGGHHHHHH\*

**SUMO2-K5TAG-H<sub>6</sub>**

MADE\*PKEGVKTENNDHINLKVAGQDGSVVQFKIKRHTPLSKLMKAYCERQGLSMRQIRFRFDGQPIN  
ETDTPAQLEMEDEDTIDVFQQQTGGHHHHHH\*

**SUMO2-K7TAG-H<sub>6</sub>**

MADEKP\*EGVKTENNDHINLKVAGQDGSVVQFKIKRHTPLSKLMKAYCERQGLSMRQIRFRFDGQPIN  
ETDTPAQLEMEDEDTIDVFQQQTGGHHHHHH\*

**SUMO2-K11TAG-H<sub>6</sub>**

MADEKPKEGV\*TENNDHINLKVAGQDGSVVQFKIKRHTPLSKLMKAYCERQGLSMRQIRFRFDGQPIN  
ETDTPAQLEMEDEDTIDVFQQQTGGHHHHHH\*

**SUMO2-K21TAG-H<sub>6</sub>**

MADEKPKEGVKTENNDHINL\*VAGQDGSVVQFKIKRHTPLSKLMKAYCERQGLSMRQIRFRFDGQPIN  
ETDTPAQLEMEDEDTIDVFQQQTGGHHHHHH\*

**SUMO2-K33TAG-H<sub>6</sub>**

MADEKPKEGVKTENNDHINLKVAGQDGSVVQF\*IKRHTPLSKLMKAYCERQGLSMRQIRFRFDGQPIN  
ETDTPAQLEMEDEDTIDVFQQQTGGHHHHHH\*

**SUMO2-K35TAG-H<sub>6</sub>**

MADEKPKEGVKTENNDHINLKVAGQDGSVVQFKI\*RHTPLSKLMKAYCERQGLSMRQIRFRFDGQPIN  
ETDTPAQLEMEDEDTIDVFQQQTGGHHHHHH\*

**SUMO2-K42TAG-H<sub>6</sub>**

MADEKPKEGVKTENNDHINLKVAGQDGSVVQFKIKRHTPLS\*LMKAYCERQGLSMRQIRFRFDGQPIN  
ETDTPAQLEMEDEDTIDVFQQQTGGHHHHHH\*

**SUMO2-K45TAG-H<sub>6</sub>**

MADEKPKEGVKTENNDHINLKVAGQDGSVVQFKIKRHTPLSKLM\*AYCERQGLSMRQIRFRFDGQPIN  
ETDTPAQLEMEDEDTIDVFQQQTGGHHHHHH\*

**Srt4S-H<sub>6</sub>**

MQAKPQIPKDKSKVAGYIEIPDADIKEPVYPGPATREQLDRGVCFVEENESLDDQNIAGHTAIDRPNY  
QFTNLRAAKKGSVMVYLKVGNETRKYKMTSIRNVKPTAVEVLDEQKGDQKQLTLVTCCDDYNFETGVW  
ETRKIFVATEVKGSHHHHHH\*

**Srt5M-H<sub>6</sub>**

MQAKPQIPKDKSKVAGYIEIPDADIKEPVYPGPATREQLNRGVSAEENESLDDQNIAGHTFIDRPNYQ  
FTNLKAAKKSVMVYFKVGNETRKYKMTSIRNVKPTAVEVLDEQKGDQKQLTLITCCDDYNEETGVWET  
RKIFVATEVKLEHHHHHH\*

**Srt2A-H<sub>6</sub>**

MQAKPQIPKDKSKVAGYIEIPDADIKEPVYPGPATREQLNRGVCFHDENESLDDQNISIAGHTFIDRPNY  
QFTNLKAAKPGSMVYFKVGNETRKYKMTSIRKVHPNAVEVLDEQEGKDKQLTLVTCDDYNEETGVWE  
SRKIFVATEVKGSHHHHHH\*

**Srt4S-TEV-H<sub>6</sub>**

MQAKPQIPKDKSKVAGYIEIPDADIKEPVYPGPATREQLDRGVCFVEENESLDDQNISITGHTAIDRPNY  
QFTNLRAAKKGSVMYFKVGNETRKYKMTSIRNVKPTAVEVLDEQKGGKDKQLTLVTCDDYNFETGVW  
ETRKIFVATEVKGSENLYFQGHHHHHH\*

**Srt5M-TEV-H<sub>6</sub>**

MQAKPQIPKDKSKVAGYIEIPDADIKEPVYPGPATREQLNRGVSF AEENESLDDQNISIAGHTFIDRPNYQ  
FTNLKAAKKGSMVYFKVGNETRKYKMTSIRNVKPTAVEVLDEQKGGKDKQLTLITCDDYNEETGVWET  
RKIFVATEVKLEENLYFQGHHHHHH\*

**Srt2A-TEV-H<sub>6</sub>**

MQAKPQIPKDKSKVAGYIEIPDADIKEPVYPGPATREQLNRGVCFHDENESLDDQNISIAGHTFIDRPNY  
QFTNLKAAKPGSMVYFKVGNETRKYKMTSIRKVHPNAVEVLDEQEGKDKQLTLVTCDDYNEETGVWE  
SRKIFVATEVKGSENLYFQGHHHHHH\*

**H<sub>6</sub>-Rap80(1-137) 7A Linker**

MPSSHHHHHHSSGPRRKKKVKVSESRNLEKDKVETTSVSVKRKRRLLED AFIVISDSGEEPKEENGL  
QKTKTKQSNRAKCLAKRKIAQMTEEEQFALALKMSEQEA AAAAAAAAAEEEEELLRKAIAESLNSCRPSD  
ASATRSRPLATG\*

**H<sub>6</sub>-Rap80(35-124) 7A Linker C70S C120S**

MPSCHHHHHHSSGRLEDAFIVISDSGEEPKEENGLQKTKTKQSNRAKSLAKRKIAQMTEEEQFALALK  
MSEQEA AAAAAAAAAEEEEELLRKAIAESLNSRPS\*

**H<sub>6</sub>-Rap80(35-124) 7A Linker**

MPSCHHHHHHSSGRLEDAFIVISDSGEEPKEENGLQKTKTKQSNRAKCLAKRKIAQMTEEEQFALALK  
MSEQEA AAAAAAAAAEEEEELLRKAIAESLNSCRPS\*

**H<sub>6</sub>-TEV-G-SUMO2**

MHHHHHHHENLYFQGG ADEKPKEGVK TENNDHINLKVAGQDGSVVQFKIKRHTPLSKLMKAYCERQG  
LSMRQIRFRFDGQPINETDTPAQLEMEDED TIDVFQQQTGG\*

**wt Ubiquitin**

MQIFVKTLTGKTITLEVEPSDTIENVKAKIQDKEGIPPDQQR LIFAGKQLEDGRTLSDYNIQKESTLHLVL  
RLRGG\*

**wt Ubiquitin-H<sub>6</sub>**

MQIFVKTLTGKTITLEVEPSDTIENVKAKIQDKEGIPPDQQR LIFAGKQLEDGRTLSDYNIQKESTLHLVL  
RLRGGHHHHHH\*

**Ub(PS)**

MQIFVKTLTGKTITLEVEPSDTIENVKAKIQDKEGIPPDQQR LIFAGKQLEDGRTLSDYNIQKESTLHLVL  
PLSGG\*

**Ub(LPS)**

MQIFVKTLTGKTITLEVEPSDTIENVKAKIQDKEGIPPDQQR LIFAGKQLEDGRTLSDYNIQKESTLHLVL  
LPLSGG\*

**Ub(PT)**

MQIFVKTLTGKTITLEVEPSDTIENVKAKIQDKEGIPPDQQR LIFAGKQLEDGRTLSDYNIQKESTLHLVL  
PLTGG\*

**Ub(PT)-H<sub>6</sub>**

MQIFVKTLTGKTITLEVEPSDTIENVKAKIQDKEGIPPDQQR LIFAGKQLEDGRTLSDYNIQKESTLHLVL  
PLTGGHHHHHH\*

**Ub(LPT)**

MQIFVKTLTGKTTITLEVEPSDTIENVKAKIQDKEGIPPDQQRLLIFAGKQLEDGRTLSDYNIQKESTLHLVL  
LPLTGG\*

**Ub(LPT)-H<sub>6</sub>**

MQIFVKTLTGKTTITLEVEPSDTIENVKAKIQDKEGIPPDQQRLLIFAGKQLEDGRTLSDYNIQKESTLHLVL  
LPLTGGHHHHHH\*

**Ub(AT)**

MQIFVKTLTGKTTITLEVEPSDTIENVKAKIQDKEGIPPDQQRLLIFAGKQLEDGRTLSDYNIQKESTLHLVL  
ALTGG\*

**Ub(AT)-H<sub>6</sub>**

MQIFVKTLTGKTTITLEVEPSDTIENVKAKIQDKEGIPPDQQRLLIFAGKQLEDGRTLSDYNIQKESTLHLVL  
ALTGGHHHHHH\*

**Ub(LAT)**

MQIFVKTLTGKTTITLEVEPSDTIENVKAKIQDKEGIPPDQQRLLIFAGKQLEDGRTLSDYNIQKESTLHLVL  
LALTGG\*

**Ub(LAT)-H<sub>6</sub>**

MQIFVKTLTGKTTITLEVEPSDTIENVKAKIQDKEGIPPDQQRLLIFAGKQLEDGRTLSDYNIQKESTLHLVL  
LALTGGHHHHHH\*

**Ub(LAT\*)**

MQIFVKTLTGKTTITLEVEPSDTIENVKAKIQDKEGIPPDQQRLLIFAGKQLEDGRTLSDYNIQKESTLHLVL  
LALTGYEAAAKHHHHHH\*

**Ub(LPT\*)**

MQIFVKTLTGKTTITLEVEPSDTIENVKAKIQDKEGIPPDQQRLLIFAGKQLEDGRTLSDYNIQKESTLHLVL  
LPLTGYEAAAKHHHHHH\*

**Ub(LPT\*)**

MQIFVKTLTGKTTITLEVEPSDTIENVKAKIQDKEGIPPDQQRLLIFAGKQLEDGRTLSDYNIQKESTLHLVL  
LPLTGLHGYEAAAKHHHHHH\*

**H<sub>6</sub>-Thrombin-USP2**

MGSSHHHHHHSSGLVPRGSSSPGRDGMNSKSAQGLAGLRNLGNTCFMNSILQCLSNTRERLDYCLQRL  
YMRDLHHGSNAHTALVEEFAKLIQTIWTSSPNDVVSPEFKTQIQRYAPRFVGYNQDQAQEFFRFLLDG  
LHNEVNRVTLRPKSNPENLDHLPDDEKGRQMWRKYLEREDSRIGDLFVGQLKSSLTCTDCGYCSTVFD  
PFWDLSLPIAKRGYPEVTLMDCMRLFTKEDVLDGDAAPTCCRCRGRKRCIKKFSIQRFPKILVLHLKRFS  
ESRIRTSKLTTFVNFPLRDLDLREFASENTNHA VYNLYAVSNHSGTTMGGHYTAYCRSPGTGEWHTFN  
DSSVTPMSSQVRTSDAYLLFYELASPPSRM\*

**H<sub>6</sub>-Thrombin-SEN2**

MGSSHHHHHHSSGLVPRGSHMDLLELTEDMEKEISNALGHGPQDEILSSAFKLRITRGDIQTLKNYHWL  
NDEVINFYMNLLVERNKKQGYPALHVFSTFFYPKLSGGYQAVKRWTKGVNLFQEIILVPIHRKVHW  
SLVVIDLRKKCLKYLDSMGQKGHRICEILLQYLQDESKTKRNSDLNLEWTHHSMKPHEIPQQLNGSDC  
GMFTCKYADYISRDKPITFTQHQMPLFRKKMVWEILHQQL\*

**H<sub>6</sub>-Thrombin-UCHL3**

MGSSHHHHHHSSGLVPRGSHMEGQRWLPLEANPEVTNQFLKQLGLHPNWQFVDVYGMDPELLSMVP  
RPVCAVLLFPITEKEYEVRTEEEEEKIKSQGQDVTSSVYFMKQTISNACGTIGLIHAIANNKDKMHFESGS  
TLKKFLEESVSMSPPEARARYLENYDAIRVTHE TSAHEGQTEAPSIDEKVDLHFIALVHVDGHL YELDGR  
KPPINHGETSDETLLDAIEVCKKFMERDPDELRFNAIALSAA\*

**GST-UBE2R1 (Cdc34)**

MSPILGYWKIKGLVQPTRLLEYLEEKYEEHLYERDEGDKWRNKKFELGLEFPNLPYYIDGDVKLTQS  
MAIIRYIADKHNMLGGCPKERAISMLEGAVLDIRYGVSR IAYSKDFETLKVDFLSKLP EMLKMFEDRL  
CHKTYLNGDHVTHPDFMLYDALDVVLYMDPMCLDAFPKLVCFKKRIEAI PQIDKYLKSSKYIAWPLQG  
WQATFGGGDHPKSDLEVL FQGPLGSARPLVPSSQKALLLEL KGLQE EEPVEGFRVTLVDEGDLYNWEV

AIFGPPNTYYEGGYFKARLKFPIDYPYSPPAFRFLTKMWHPNIYETGDVCISILHPPVDDPQSGELPSERW  
NPTQNVRTILLSVISLLNEPNTFSPANVDASVMYRKWKESKGDREYTDIIRKQVLGTKVDAERDGVK  
VPTTLAEYCVKTKAPAPDEGSDLFYDDYYEDGEVEEEADSCFGDDEDDSGTEES\*

**GST-UBE2N (Ubc13)**

MSPILGYWKIKGLVQPTRLLEYLEEKYEEHLYERDEGDKWRNKKFELGLEFPNLPYYIDGDVKLTQS  
MAIIRYIADKHNMLGGCPKERAISMLEGAVLDIRYGVSRIAYSKDFETLKVDFLSKLPEMLKMFEDRL  
CHKTYLNGDHVTHPDFMLYDALDVVLYMDPMCLDAFPKLVCFKKRIEAIPOIDKYLKSSKYIAWPLQG  
WQATFGGGDHPPKSDLEVLVQGPLGSAGLPRRIKETQRLLAEPVPGIKAEPDESNARYFHVVIAGPQDS  
PFEGGTFKLELFLPEEYPMAAPKVRFMTKIYHPNVDKLGRIKLDILKDKWSPALQIRTVLLSIQALLSAP  
NPDDPLANDVAEQWKTNEAQAIETARAWTRLYAMNNI\*

**GST-UBE2V1 (Uev1A)**

MSPILGYWKIKGLVQPTRLLEYLEEKYEEHLYERDEGDKWRNKKFELGLEFPNLPYYIDGDVKLTQS  
MAIIRYIADKHNMLGGCPKERAISMLEGAVLDIRYGVSRIAYSKDFETLKVDFLSKLPEMLKMFEDRL  
CHKTYLNGDHVTHPDFMLYDALDVVLYMDPMCLDAFPKLVCFKKRIEAIPOIDKYLKSSKYIAWPLQG  
WQATFGGGDHPPKSDLEVLVQGPLGSPGEVQASYLKSQSKLSDEGRLEPRKFHCKGVKVPNFRLLLE  
LEEGQKGVGDGTVSWGLEDDMTLTRWTGMIIGPPRTIYENRIYSLKIECGPKYPEAPPFVRFVTKIN  
MNGVNSSNGVVDPRASVLAKWQNSYSIKVVLQELRRLMMSKENMKLPQPPEGQCYSN\*

## Supplementary References

1. Kulathu, Y., Akutsu, M., Bremm, A., Hofmann, K. & Komander, D. Two-sided ubiquitin binding explains specificity of the TAB2 NZF domain. *Nat Struct Mol Biol* **16**, 1328-30 (2009).
2. Varadan, R., Assfalg, M., Raasi, S., Pickart, C. & Fushman, D. Structural determinants for selective recognition of a Lys48-linked polyubiquitin chain by a UBA domain. *Mol Cell* **18**, 687-98 (2005).
3. Reed, S.A., Brzovic, D.A., Takasaki, S.S., Boyko, K.V. & Antos, J.M. Efficient Sortase-Mediated Ligation Using a Common C-Terminal Fusion Tag. *Bioconjug Chem* **31**, 1463-1473 (2020).
4. Sims, J.J. & Cohen, R.E. Linkage-specific avidity defines the lysine 63-linked polyubiquitin-binding preference of rap80. *Mol Cell* **33**, 775-83 (2009).
5. Anamika & Spyropoulos, L. Molecular Basis for Phosphorylation-dependent SUMO Recognition by the DNA Repair Protein RAP80. *J Biol Chem* **291**, 4417-28 (2016).
6. Shen, Y., Delaglio, F., Cornilescu, G. & Bax, A. TALOS+: a hybrid method for predicting protein backbone torsion angles from NMR chemical shifts. *J Biomol NMR* **44**, 213-23 (2009).
7. Kyte, J. & Doolittle, R.F. A simple method for displaying the hydropathic character of a protein. *J Mol Biol* **157**, 105-32 (1982).
